# Supplementary material for: The transcript elongation factor SPT4/SPT5 is involved in auxin-related gene expression in Arabidopsis
Source: PubMed Central journal article supplement — Nucleic Acids Res. 2014 Jan 31;42(7):4332–47. doi: 10.1093/nar/gku096 (PMC3985667; doi:10.1093/nar/gku096), 2014-01-31
Supplement: supp_gku096_nar-02877-v-2013-File010.pdf [file supp_gku096_nar-02877-v-2013-File010.pdf]

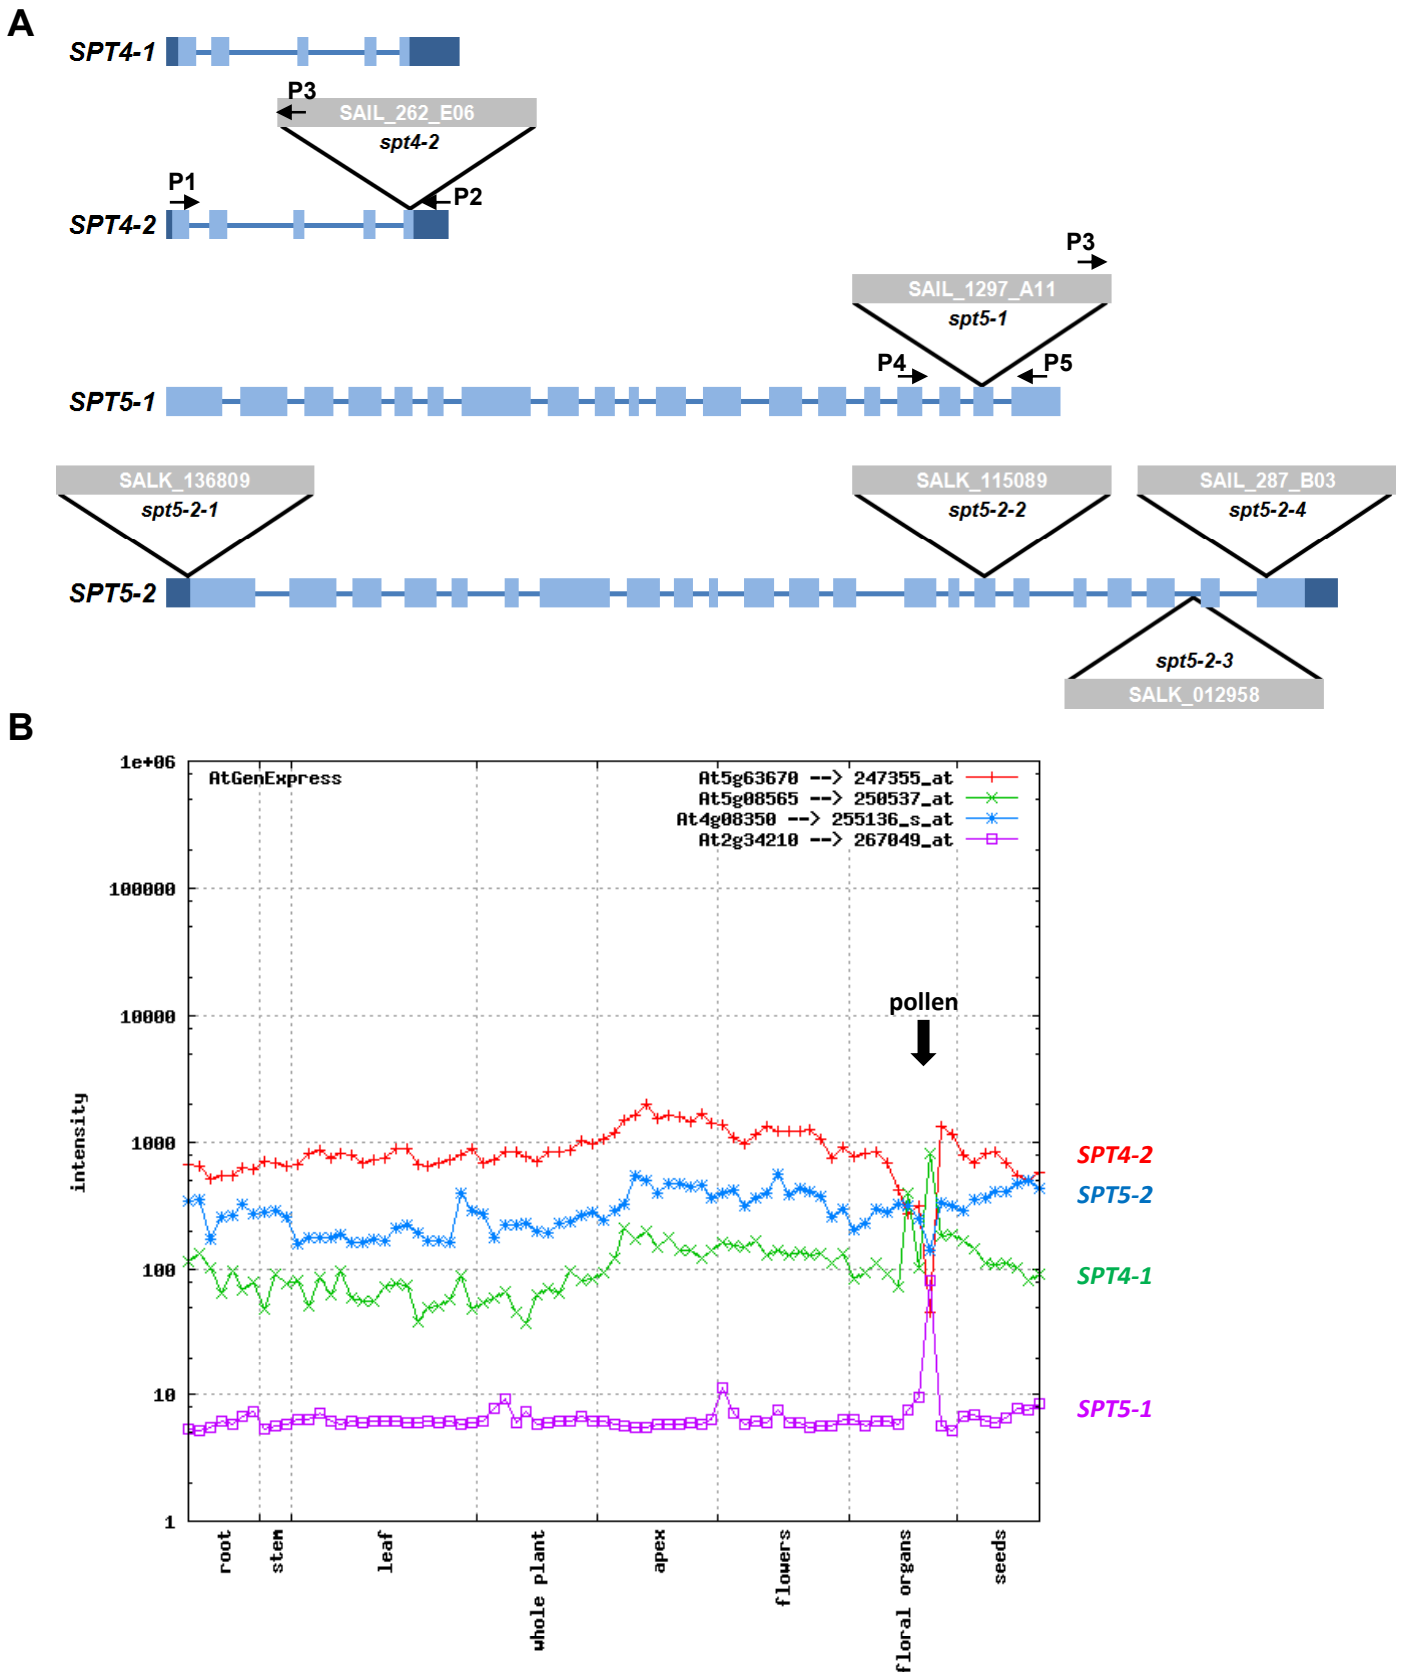

**Figure S1.** Gene models and expression. (A) The gene models of the SPT4 and SPT5 genes are adapted from the Arabidopsis database (<http://www.arabidopsis.org/>). Coding sequences are indicated by light blue boxes, UTRs in dark blue, while introns are depicted as lines. The positions of T-DNA insertions are also indicated. (B) The transcript levels of the four genes in various tissues are displayed using the AtGenExpress tool (<http://jsp.weigelworld.org/expviz/expviz.jsp>) based on a large set of public microarray transcript profiling data.

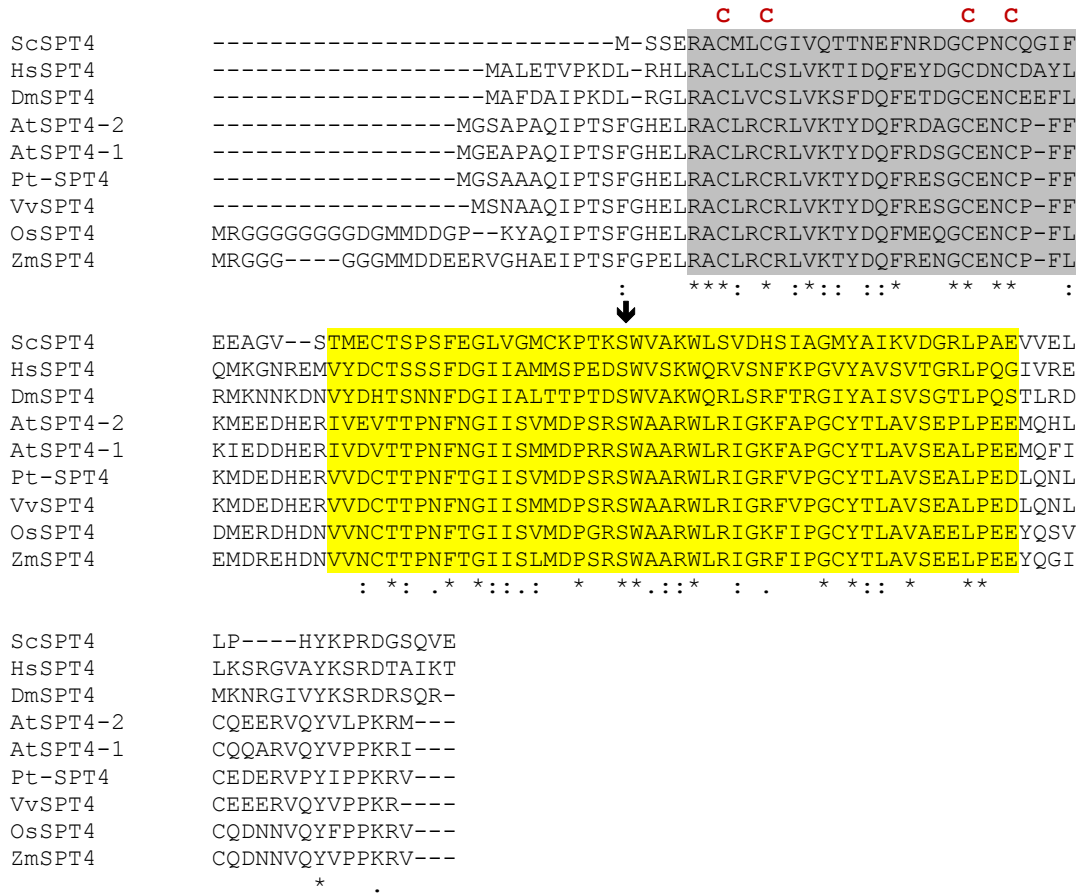

**Figure S2.** Amino acid sequence alignment of SPT4 of different species. The alignment was generated using Clustal Omega (<http://www.ebi.ac.uk/Tools/msa/clustalo/>) and the SPT4 amino acid sequences of *Sacharomyces cerevisiae* (Sc), *Homo sapiens* (Hs), *Drosophila melanogaster* (Dm), the dicot species *Arabidopsis thaliana* (At), *Populus trichocarpa* (Pt), *Vitis vinifera* (Vv) and the monocot species *Oryza sativa* (Os) and *Zea mays* (Zm). The Zinc-binding motif is highlighted in grey and the NGN-binding domain mediating the interaction with SPT5 in yellow. The four Cys residues forming the Zinc finger are depicted in red on top of the sequences, and the Ser residue critical for SPT5-interaction is indicated by an arrow (9). Asterisks below the sequences indicate invariant residues, while (:) indicate residues that are highly conserved. When compared to their orthologs from other organisms, for instance, SPT4-2 shares 27.4%, 35.8% and 67.2% amino acid sequence identity with its yeast, human and rice relatives, respectively.

ScSPT5 MSDNSDTNVSMDQHDQFADPVVVPQSTDTKDENTS SDKDTVDSGNVTTTESTERAESTSN  
HsSPT5 MSDSEDSN-----  
DmSPT5 MSDSEVSN-----  
AtSPT5-1 MSQYS-----D-----  
AtSPT5-2 MPRSRDEDELGDY-----E  
PtSPT5 MARRRDEDDLEDEE-----Y  
VvSPT5 MPRRRHDDD---DDD-----L  
OsSPT5 MSRGSREEED-----EEEVY  
ZmSPT5 MARRGHDDDDDEVDEEE-----EEDAY

\*

ScSPT5 IPPLDGEEKEAKSEPQQPEDNAETAATEQVSSSNGPATDDAQATLNTDSSEANEIVKKEE  
HsSPT5 ---FSEED-----SERSSD  
DmSPT5 ---MSDSGSEDGSI--SNK-SQRSARSKRSRSGSRGS--RSVSRSR--SQSGHSRS  
AtSPT5-1 -----  
AtSPT5-2 ALDLEEEEEDEEE---EEE-RGR---G-----GG  
PtSPT5 EEQEEQLMDEEEY---EEE-EEE---D-----RG  
VvSPT5 EPEEDVLDDDEDY--EDE-DVG-----V  
OsSPT5 DS----EEEEEEEG--EVE-ERG---GKR--SRGG-----G  
ZmSPT5 DLDDDEDEDEEDDY--EEE-TRR---GKA--SRGG-GG-----AKSG

ScSPT5 GSDERKRPREDTKNSDGDTKDEGDNKDEDDDDDDDDDDDDDE-----  
HsSPT5 GEEA---EVDEERRSAA-----GSEKEEPEDE-EEEEEEYDEEEE-----  
DmSPT5 GSES---PQRDRNRGKS-----DESGEEEPP-GEDIDSEYDEEEN-----  
AtSPT5-1 -----DDYSHEDDSEM-EDEDEEYEPSSRKGRSGKGRGR  
AtSPT5-2 GSR-----RKRGRSNFI-----DDYAEEDSQEE-D--DDDEDYSS-----R  
PtSPT5 AAI-----KRRRSDFI-----DDIAEEDEEE-DDDDDEDYGGG-----G  
VvSPT5 GSS-----RKRSEFI-----DDVAEEDDED--DDDDDFGGG-----R  
OsSPT5 GGG-----KWSGVESFI-----DDAASEDEDEE-EEEDDEDYVGGG-----  
ZmSPT5 GGR-----KRSREDNFI-----DDSAIDEDDE-D-----DDGGGR-PR-----

. \* : . ::

ScSPT5 -----APTKRRRQERNRFLDIEAEVSDDEDEDEDEDESELVRE-----GFITH-  
HsSPT5 ----EEDDRPPKPRHGGFILDADVDEYEDQWE--DGAEDILEKEEIEASNIDN-  
DmSPT5 ----DDHPRKKKKRFGGFIIDEAEVDEVEDDEWE--EGANEIGIVG---NEIDE-  
AtSPT5-1 SNSDSDGRRGSKKSSGSAFIDWEVEVDDVDDDDVDDVDDGKQLKFGDFSLCFIVS-  
AtSPT5-2 GGKGA---ASKRKKPSASIFLDREAHQVDEDEEEE---DEAED-----DFIVD-  
PtSPT5 GGGGGGRKQKGRRGSEFFDDIAQVASDD-DEEE---EDAED-----DFIVDD  
VvSPT5 RG-----SHRAKRRSGSEFLDLEAAVDSDE-EEEE---EDGED-----DFIVD-  
OsSPT5 ----GGR--ARKRRASILIDMAQVDEEEEEEED-----GEFEDGFID-D  
ZmSPT5 -----KKGGGVRFDFDEEAQVDEDEEEDE---GEGED-----DFIN-D

:: . .: ::: \*

ScSPT5 -GDDEDDEASAPGARRDRLRQLDQDLNKTSEEDAQRLAKELRERYGRSSSKQYRAA--  
HsSPT5 VV-L--DEDRSGA-----RRLQN-LWR-DQREELGEYMKKYAKSSVGETVYG-G  
DmSPT5 LGPT--ARDIEIR-----RRGTN-LWD-TQKEDEIEEYLRKKYADESIAKRHFGDG  
AtSPT5-1 GEADLPNEDSDHRR---QYQRFHP-HEE---DVDELEKRTLRLSTKYA---KDD-Y  
AtSPT5-2 NGTDLPPERDR-----RYE-RRFLP-RDENEDVEDLERRIQERFSSRH---HEE-Y  
PtSPT5 HGADLPDEASGR-----RMH-RPLLS-REDDQEDVEALERSIQARYAKSM---HSE-Y  
VvSPT5 AGAELPDEDDGQ-----RMRRLPLP-QEDEDQEDFEALERKIQERYGKSS---HAE-Y  
OsSPT5 TRADDPDQDVGRSS---R---RHPSS-MLDEEEDVDALVKLIHDRIIPSS---HFV-D  
ZmSPT5 AGADLPDEDVVRGS---R---RHSIP-MRDEEEDIDEMERQVRERYARST---HIE-Y

. : : : :

ScSPT5 --AQDGYVQRFLLPVDTATIWGVRCRPGKEKELIRKLLKKKFNLDAMGKKKILSI  
HsSPT5 SDELSDDITQQQLLPGVKDPNLWTVKCKIGEERATAISLMRKFIA--YQFTDPLQIKSV  
DmSPT5 GEEMSDEITQQTLPGIKDPNLMMVKCRIGEEKATALLMRKYLT--YLNDDPLQIKSI  
AtSPT5-1 ELDDVNDVDQALLPSVRDPKLWLKCAIGREREVAVCLMQKIVD-----RGSEFKIRSA  
AtSPT5-2 D-EEATEVEQALLPSVRDPKLWLVKCAIGREREVAVCLMQKIFID-----RGADLQIRSV  
PtSPT5 D-EETTEVEQALLPSVRDPKLWLVKCAIGRERETAVCLMQKYID-----KGSELQIRSV  
VvSPT5 D-EETTEVEQALLPSVRDPKLWLVKCAIGHREAAVCLMQKSID-----KGPEVQIRSA  
OsSPT5 DDDGVTEVEQALLPSVDPKLWLVKCAIGHRETAICLMQKSID-----T-PDLQIKSV  
ZmSPT5 G-EEAAEVEQALLPSVDPKLWLVKCAIGHRETAICLMQKIFID-----R-SDLQIKSV

: \*: \*\*.: .:\* \*\* \*.: \*:\* . ::\* \*

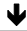

ScSPT5 FQRDNYTGRIYIEAPKQSVIEKFCNGVDPDIYI--SQKLLIPVQELPLLLKPNKSDDVVALE  
HsSPT5 VAPEHVKGYIYVEAYKQTHVKQAIIEGVGNLRLGYWNQQMVPIKEMTDVLKVV-KEVANLK  
DmSPT5 IAPEGVKGYIYLEAYKQTHVKTCIDNVGNLRMGKWKQEMVPIKEMTDVLKVV-KEQVGLK  
AtSPT5-1 IALDHLQNYVYIEADMEAHVKEAIKGMRNIA-NQKILLVPIKEMTAVLSVE-SKAIDLS  
AtSPT5-2 VALDHLKNFYIEADKEAHVKEAIKGMRNIA-NQKILLVPIREMTDVLSVE-SKAIDLS  
PtSPT5 VALDHLKNYIYIEADKEAHVREACKGLRNIFG--QKIMLVPIREMTDVLSVE-SKVIDLS  
VvSPT5 IALDHLKNYIYIEADKEAHVKEACKGLRNIA--QKVMLVPIREMTDVLSVE-SKAVDLS  
OsSPT5 LALDHLKNYIYVEAYKEAHVKEACKGVRNIFA-SRKVTLVPIREVADVLSVQ-SKSTDIS  
ZmSPT5 VALDHLKNYIYVEAEKEAHVKEACKGLRNIA-SAKITLVPIKEMADVLSVE-SKSV DLS  
. : : \* : \* \* : : . . : : : : : : \* : \* : \* : \* : \* . . . : :

ScSPT5 EGSYVRIKRGYKGD LAMVDQISENNLEVM LKIVPRLDYGKFDEIDPTTQ-QRKSRRPTF  
HsSPT5 PKSWVRLKRGYKDDIAQVDYVEPSQNTISLKMIPRIDYDRIKARMSLKD---WFAKRKK  
DmSPT5 VKQWVRLKRGYKDDIAQVDYVDLAQNQVHLKLLPRIDYTRMRGALRTTATESDDSKRKK  
AtSPT5-1 RDSWVRMKG IYKGD LAKVVDV DNV RKRRTVTKLI PRIDLQALANKLEGT----ENVK-KK  
AtSPT5-2 RDTWVRMKG IYKGD LAKVVDV DNV RQRVTVTKLI PRIDLQALASKLDGR----EVS K-KK  
PtSPT5 RDTWVRMKG IYKGD LAKVVDV DNV RQRVTVTKLI PRIDLQALANKLEGR----EAPK-KK  
VvSPT5 RNTWVRMKG IYKGD LAKVVDV DNV RQRVTVQ LI PRIDLQALANKLEGR----EVVT-KK  
OsSPT5 INTWVRMKG IYKGD LAKVVDV DNV HQKVTVTKLI PRIDLQALANKFDGL----KVVKEKK  
ZmSPT5 RDSWVRMKG IYKGD LAKVVDV DNV RQRV DVKLI PRIDLQALASKLEGR----DIVK-KK  
: \* : \* \* \* \* : \* \* : . . : : : : \* : \* : \* : \* : \* . . . : :

ScSPT5 AHRAPPQLFNPTMALRLDQANLYKRD----DRHFTYKNEDYIDGYLYKSFRIQHVETKNI  
HsSPT5 FKRPPQRLFDAEKIRSLGGDV-----ASDGDFLIFEGNRYSRKGF LFKSFAMSAVITEGV  
DmSPT5 KRRPAAKPFDPEAVRAIGGEV-----HSDGDFLIFEGNRYSRKGF LKNTMSAILSDGV  
AtSPT5-1 AFAPPPRFMNIDEARELHIRVEHRRDPMTGDYFENIGGMLFKDGF LKVKVSTKSIAAQNV  
AtSPT5-2 AFVPPPPRFMNIDEARELHIRVERRRDHMTGDYFENIGGMLFKDGF LKQVSLKSITVQNV  
PtSPT5 AFVPPPPRFMNIDEARELHIRVERRRDPMTGDYFENIGGMLFKDGF LKTVSMKSI SAQNI  
VvSPT5 AFKPPPPRFMNVEEAREMHIRVERRRDPMTGDYFENIGGMLFKDGF LKTVSMKSI SVQNI  
OsSPT5 SFVPPPKLFSANEAR-----NRDSGEYYEMVDGLKFKDGF LHKTFSTKSISAHNI  
ZmSPT5 AFVPPPPRFNIDEAREMHIRVERRRDKESGEYFEWVDNLKFKDGF LKSVSTKSIHKSNI  
: : . . : : \* : \* . . . : :

ScSPT5 QPTVEELARFSGKEGAVDLT SVS QS I KKAQA AKV TFQPGDRIEVLNGEQRGSKGIVTRTT  
HsSPT5 KPTLSELEKFFEDQPEGIDLEVVTEST-GK-EREHNFQPGDNVEVCEGELINLQ GKILSDV  
DmSPT5 KPTLAELERFEE S PEEVNLEIMGTVKDDP-TMAHSFSGMDNVEVCGDLENLQAKIVAID  
AtSPT5-1 TPTFDELERFKRPNENGEIDFVDESTL FANRKKGHFMKGD A V I V I K G D L K N L K G W I E K V D  
AtSPT5-2 TPTFDELEKFNKPS ENGEIDFGGLSTL FANRKKGHFMKGD A V I V I K G D L K N L K G W V E K V D  
PtSPT5 KPSFDELEKFRSPG ENGDGDV ASLSTL FANRKKGHFMKGD A V I V V K G D L K S L K G W V E K V D  
VvSPT5 QPTFDELEKFRTPGETEDGDMA SLSTL FANRKKGHFMKGD A V I I V K G D L K N L K G W V E K V E  
OsSPT5 QPSFDELEKFR EPDNDINEDAASLSTL FNRKKGHFMKGD S V I V I K G D L K N L E G Y V E K A E  
ZmSPT5 QPTFDELEKFKKPGDDMNGDMA SLSTL FANRKKGHFMKGD A V I V I K G D L K N L E G V E K V E  
\* : . \* \* : \* : : \* \* \* : : \* : \* : \* : \* : \* . . . : :

ScSPT5 KDIATI--KLN GFTT PLEFP I STL R K I FEPGDHVTVINGEHQGDAGLVL MVEQGQVTFMS  
HsSPT5 GNKITIMPKHEDLKDMLFPAQELRKYFKMGDHVKVIAGRFEGDTGLI VRVEENFVILFS  
DmSPT5 GTMITVM PKHQDLK DPLIFKASELRKYFKTGDHARVLAGRYEGETGLI IRVEPTRVVLVS  
AtSPT5-1 EENVLIRSEM KDL PNP IAVNGRELCKYFEPGNHVKV VSGIHEGGTGMIVKVDQHMLI ILS  
AtSPT5-2 EENVLIRSEVKGLPDPLAVNERELCKYFEPGNHVKV VSGTHEGATGMVVKVDQHVL ILS  
PtSPT5 EENVHIRPEM KGLPKTLAVNEKELCKYFEPGNHVKV VSGTHEGVTGMVVKVEQ-----  
VvSPT5 EENVHIRPEM KGLPKTLAVNEKELCKYFEPGNHVKV VSGTQEGATGMVVKVEGHVLI ILS  
OsSPT5 DATVHIRSKLPGLLNTLVFNEGD LCKCFNPGDHVKV VSGVQEGATGLVVKVEGHVLI ILS  
ZmSPT5 DETVHIRPKISDLPKTLAFNEKELCKYFKPGDHVKV I S G V Q E G A T G M V V K V E G H V L I I L S  
: : : : . \* \* \* : \* : \* : \* : \* : \* : \* : \* : \* . . . : :

ScSPT5 TQTSREVTITANNLSKSIDTTA---TSSEYALHDIVELSAKNVACIIQAGHDI FKVIDET  
HsSPT5 DLTMHLEKVLPRDLQLCSETASGVDVGGQHEW GELVQLDPQTVGVIVRLERET FQVLNMY  
DmSPT5 DLTNHELEVLPRDLQLCSDVATGVDCLGQFQWGD MVQLDSQNVGVI VRLEREN FHV LGMN  
AtSPT5-1 DTTKEHIVCFADHVAKSAEVTGKVTKIGDYELHDLVILSDF SFGVILKLDSEAIQ I LKGV  
AtSPT5-2 DTTKEHVRVFADHVVESEVTTGVTKIGDYELHDLVLLDNLSFGVI IRL EN EAFQVLKGV  
PtSPT5 -----HIRVFADHVVESEVTTGVTKIGDYELHDLVLLDNMSFGLI IRVESEAFQVLKGV  
VvSPT5 DTTKEHLRVFADHVVESEVTTGVTRIGDYELHDLVLLDNLSFGVI IRVESEAFQVLKGV  
OsSPT5 DTTKEHIVRFADHVVESEVTTGLTRIGDYELHDLVLLGWKKHFRQENLYRTFHILKGE  
ZmSPT5 DTTKEHIVRFADHVVESEITTGITRIGDYELHDLVLLDNLSFGVI IRVEAEAFQVLKGV  
: : : : . : . : \* \* : \* : \* : \* : \* : \* : \* . . . : :

ScSPT5 GKVSTITKGSILSKINTARARVSSVDANGNEIKIGDT--IVEKVGSRREGQVLYIQTOQI  
HsSPT5 GKVVTVRHQAV--TRKKDNRFVALDSEQNNIHVKDVIKVIDGPHSGREGEIRHLFRSFA  
DmSPT5 GKCIECKPTAL--HKRKENRHTVALDADQNQIRRRDVVKVMEGPHAGRSGEIKHLYRSLA  
AtSPT5-1 PDSSEVSVKASEIKYKIWKKINVQDRYKNVAVKDVVRVIEGPKGKQGPVVQIYKGVL  
AtSPT5-2 PDRPEVALVKLREIKCKLEKKNINVQDRYKNVIAVKDDVVRVIEGPKGKQGPVKHIYKGVL  
PtSPT5 TERAVALVRLREIKCKIEKKNINVQDRYKNVSVKDVVRIIDGPCKGKQGPVEHIYRQVL  
VvSPT5 PDRPEVVLVKLREIKFKIDKRVNVQDRFKNVSVKDVVRILDGPCKGKQGPVEHIYKGVL  
OsSPT5 PDKPELVVLVKLREIKSKIYRRTSAKDRSSNIVSTKDVVRVIEGACKVESKGLWNIYTEY  
ZmSPT5 PDRPEVVLVKLREIKSKIERRSSAKDRSNNIISAKDVVRVIEGACKGKQGPVEHIHKGML  
. . \* \* : \* ::: . . :

ScSPT5 FVVSKKIVENAGVFFVNPNSVEAVASKDNM-LSNKM--DLSKMNPEIISKMGPPSSKTFQ  
HsSPT5 FLHCKKLVENGGMFVCKTRHLVLAGGSKPRDVTNFTVGGFAPM-SPRISSPMHPSAGGQR  
DmSPT5 FLHCRMYTENGGFVCKTRHLQLAGGSKTTVSNAGIVGGLGFM-SPRIQSPMHPSGGR--  
AtSPT5-1 FIHDRHNLEHTGFICTRCSVCVLAGG-----NFKTPALVPPSPRRFQ  
AtSPT5-2 FIYDRHLEHAGFICAKTSCIVVGGSRSGANRNGGDS-LSRYGNFKAPAPVPPSSPGRFQ  
PtSPT5 FIYDRHLEHAGYICAKSHSCIVIGGSRNGDRN-GDS-YSRLGSFKT-PRVPPSPRRFP  
VvSPT5 FIYDRHLEHAGFICAKSHSCVVGSRSNADRS-GDS-FSRFANLRTPPRPVPPSPRRFP  
OsSPT5 FLFMIVTTLNIQALSVAHNH-----ASLLGDQLGMGTVDPRFGAFRSSARILQSPGRLP  
ZmSPT5 FIYDRHLEHAGFICAKAQSCLLVGGSTGGRRNGMDTADARLDALRSSASILQSPGRLP  
\* : . : . \*

ScSPT5 QP----IQ-----SRGGR~~EV~~ALGKTVRIRSAGYKQGLGIVKDVNGDKATVELHS  
HsSPT5 GGFSGPGGGSGGMSRG---RGRRD~~NEL~~IGQTVRISQGPYKGYIGVVKDATESTARVELHS  
DmSPT5 ---GARGGARGGRGGF---RVTRD~~RE~~ILGKTIKISGGPYKGAIVKDATESTARVELHT  
AtSPT5-1 RADMGYNPAGGRRHQGG-RGRRGD~~DHL~~VGTYYKIRLGPFGYSGRLVEVKDKLVRVELEA  
AtSPT5-2 RGRGGGYNNSGGRHGGG-RGR-GD~~DSL~~LGTTVKIRLGPFGYRGPVVEVKGNVSRVELEM  
PtSPT5 RG--GPPFDGSGRNRGG-RG--GH~~DAL~~VGTTIKVRQGPFGYRGRVVDIKGQFVRVELES  
VvSPT5 RG--GRPMDSGRHRGG-R---GH~~DSL~~IGSTIKIRQGPFGYRGRVVDVNGQSVRVELES  
OsSPT5 PK--APHNTYGRRFGRDHGGKGH~~DTL~~VNRCIKIKSGPYKGYRGRVKEMTGALVRVELDS  
ZmSPT5 PR--GPNMNYGRRFGGG-RGGRGY~~DAL~~VGKCIKIKSGPYKGYRGRVKEVTGALVRVELDS  
: ::: . : \*\* \* : : . \*\*\*.

ScSPT5 KKNKHIT-----IDKHKLTYNREGGEG--ITYDELVNRRGRVPQ-ARMGPSYVSAPRN  
HsSPT5 TCQTIS-----VDRQLRTTVGSRPPGGMTSTYGRTP-----MYGSQT~~PM~~YG-----  
DmSPT5 SCQTIS-----VDRNHIAIVGVTGKEGSVSTYGRTPAR---TPGYGAQT~~PS~~YT-----  
AtSPT5-1 KIVTVE-----RKAISDM-----TDNVVAT-----PQYN-----  
AtSPT5-2 KIVT-----VDRGAISDNV-A-----TTPFRDT-----SRYS-----  
PtSPT5 QMKVVVTGKYSSMSVDRSHISDNVVV-----STPYRDA-----PRYG-----  
VvSPT5 QMKVVVT-----VDRNQISDNVAV-----ATPYRDA-----PRYG-----  
OsSPT5 LMKVVA-----VKREDIADTATV-----ATPFG-E-----SHNS-----  
ZmSPT5 LMKIVT-----VKRDDIADTPTV-----ATPFR-E-----PRYS-----  
: : :

ScSPT5 MATGGIAAGAAATSSGLSGGMP~~TP~~GWSSF----DGGK~~TP~~AVNAHGGSG-----GG  
HsSPT5 --S-----GSR~~TP~~PMYGSQT~~PL~~QDGSRT~~PHY~~GSQT~~PL~~HDSRT~~PA~~QSGAWDPNNPNT  
DmSPT5 -AA-----GSK~~TP~~PLVGSQT~~PN~~WDTD~~TR~~TPYGTMT~~PS~~HDSMT~~TP~~PR-HGAWDPTANTTP  
AtSPT5-1 --M-----GSQ~~TP~~PMHPSRT~~PL~~HPCMT~~PM~~RHSGAT~~PI~~HDMRT~~PM~~RGRAWNPPMPSP  
AtSPT5-2 --M-----GSE~~TP~~PMHPSRT~~PL~~HPYMT~~PM~~RDSGAT~~PI~~HDMRT~~PM~~RDRAWNPYPMPSP  
PtSPT5 --M-----GSE~~TP~~PMHPSRT~~PL~~RPYMT~~PM~~RDSGAT~~PI~~HDMRT~~PM~~RDRAWNPYPMPSP  
VvSPT5 --M-----GSE~~TP~~PMHPSRT~~PL~~HPYMT~~PM~~RDVGT~~PI~~HDMRT~~PM~~RDRAWNPYPMPSP  
OsSPT5 --W-----GNE~~TP~~PVHPSRT~~PL~~RPFQT~~PL~~RDPGAT~~VP~~PNGMRT~~PM~~PSRAWA---PMPSP  
ZmSPT5 --L-----GGE~~TP~~PMHPSRT~~PH~~HAYQT~~PM~~RDPGAT~~PI~~HDMRT~~PM~~RSRAWA---PMPSP  
. : : . \*\* \* \* : .

ScSPT5 GVSSWGGASTWGGQNGGASAWGGAGGASAWGGQGTGATSTWGGASAWGNKSSWGGAST  
HsSPT5 SRAEEEEYAFDDEPTSPQAYGGTP-----NPQTPGYDPDSS-----PQVNPQ  
DmSPT5 ARNN-DFDYSLE-EPSPSPG----Y-----NPSTPGY-----QMTSQ  
AtSPT5-1 PRDNWED-----GNPGSWG-TS-----P-----Q  
AtSPT5-2 PRDNWED-----GNPGSWG-TS-----P-----Q  
PtSPT5 PRDNWED-----GNPGSWG-TS-----P-----Q  
VvSPT5 PRDNWEE-----GNPDSWVTTS-----P-----Q  
OsSPT5 PRLAL-----GW-----Q  
ZmSPT5 PRDNWED-----GNPATWG-SS-----P-----A

```

ScSPT5      WASGGESNGAMSTWGGTGDRSAYGGAS---TWGGNNNNKS-----TRDGGASAWGNQDD
HsSPT5      YNPQ--TPGTPAMYNTD-QFSPYAAPSQGSYQSPSPQSYHQVAPSPAG--YQNTHS--
DmSPT5      FAPQ--TPGTL--YGSDRSYSP-----FNPSPSP-----
AtSPT5-1    -----SPYEAAATPGSDWGSSTPGRSSYRDAGTPIINNA-----
AtSPT5-2    YQPG--SP-----PSRAYEAPTPGSGWASTPGG--SYSDAGTPRDHGSAYANA--
PtSPT5      YQPG--SP-----PSGTYEAPTPGSGWASTPGG--NYSEAGTPRDSSAYANA--
VvSPT5      YQPG--SP-----PSRTYEAPTPGSGWASTPGG--NYSEAGTPRDSTPAYANV--
OsSPT5      SMPG--TP-----VPQPHEAPTPGSGWAVTPGV--SFGD-----ASGKN--
ZmSPT5      YQPG--TP-----QARPYEAPTPGSGWANTPGV--SFNDAPTPRD---NYANA--
                : .

ScSPT5      GNRSAWNQ-----GNKSNY-----GG-----NSTWG
HsSPT5      --PASYHPTPSPMAYQASPSPPVGYSPMTPGAPSPGGYNPH----TPGSGIEQNSSDWV
DmSPT5      -----APSPYPVGYM--NTPSPSTYSPNTPGGIPQSPYNPQ----TPGASLDSSMGDWC
AtSPT5-1    -----NA--PSPMTPSSTSYLPTTPGGQAMTPGT-DLDVMSLDI--GGDAE-TRF
AtSPT5-2    --PSPYLPST-PG---QPMTFSSASYLPGTGGQPMTPGT-GLDVMSPIV--GGDAE-AWF
PtSPT5      --PSPYLPST-PG--GQPMTPSSASYLPGTGGQLMTPGTNGLDMMSPVI--GGDGEHPWF
VvSPT5      --PSPYLPST-PG--GQPMTPNSVSYLPGTGGQPMTPGT-GVDVMSP-I--GGEQEGPWF
OsSPT5      --PSSYATPT-PS--GQPMTPNPASYLPGTGGQPMTLGYIEMDIMSPAI--GEEGGRNWL
ZmSPT5      --PSPYVPST-PV--GQPMTPNSASYLPGTGGQPMTPGNAGMDMLSPII--GGDGEVAWL
                . * * .

ScSPT5      GH-----
HsSPT5      TTDIQVKVRDYLDTQVVQGTGVIKRSV--TGGMCSVYLKDE--KVVVISSEHLEPITPTK
DmSPT5      TTDIEVRIHT-HDDTDLVGQTGIIRTV--SNGVCSVFLRQED--RSVSIIVSEHLAPVLPKN
AtSPT5-1    IPGILVNVHKAGEDRN----PGVIRDVLPDGSCVVALGHRGEGETIRATQNKVSLVCPKK
AtSPT5-2    MPDILVDIHKAGEDTD----VGVIRDV--SDGTCKVSLGSSGEGDTIMALPSELEIIPPRK
PtSPT5      IPDILVTVHRTADESA----VGVIREVLQDGSKIVLGAHGNGETITALPSEIEMVVPKR
VvSPT5      MPDILVHIRRPEENT----LGVIREVLDPGTYRVGLGSSGGGEIVTVLHAEIDAVAPRK
OsSPT5      LPDVLVNVLRREGYDIT----CGVVKEVLPDGSCRVALGSSGSGDEITAFPNFEFVVKPKK
ZmSPT5      LPDVLVNVLRGGD-DG----PGVVREVLGDGSCRVALGSSGNGDVVTVLANEVEVIRPKK

ScSPT5      -----
HsSPT5      NNKVKVILGEDREATGVLLSIDGEDGIVRMDL---DEQLKILNLRFLGKLLLEA-
DmSPT5      GDEFKIYGDRESVGRVLSKDGDFVFCR--I---NEEIKLLPINFLCKMKSID
AtSPT5-1    NERVKILGGKYCGSTAKVIGEDGDGIVKLDE---SLDIKILKLTILAKLVHE-
AtSPT5-2    SDRVKIVGGQYRGSTGKLGIDGSDGIVKIDD---NLDVKILDLALLAKFVQFP-
PtSPT5      SDKIKILGGAHRGATGKLGVDGTDGIVKLED---TLDVKILDMVILAKLAQM-
VvSPT5      SDKIKIMGGAHRGATGKLGVDGTDGIVKVDD---TLDVKILDMVLLAKLVQFP-
OsSPT5      NDKLKIMSGSWRGLTGKLLGVDGSDGIVKVDGLETTDQTKILDATILGKLAA--
ZmSPT5      SDRIKILNGNFRGYTGKLGIDGSDGIVRLDE---TYEVKILDMVILAKLAT--

```

**Figure S3.** Amino acid sequence alignment of SPT5 of different species. The alignment was generated using Clustal Omega (<http://www.ebi.ac.uk/Tools/msa/clustalo/>) and the SPT5 amino acid sequences of *Sacharomyces cerevisiae* (Sc), *Homo sapiens* (Hs), *Drosophila melanogaster* (Dm), the dicot species *Arabidopsis thaliana* (At), *Populus trichocarpa* (Pt), *Vitis vinifera* (Vv) and the monocot species *Oryza sativa* (Os) and *Zea mays* (Zm). The acidic N-terminal domain is highlighted in yellow, the NGN domain mediating the interaction with SPT4 (and RNAPII) in grey, and the KOW domains in blue. The (putative) phosphorylated Thr residues of the C-terminal repeats (CTR) are indicated in red, and the Glu residue within the NGN domain that is critical for SPT4-interaction is indicated by an arrow (9). Asterisks below the sequences indicate invariant residues, while (:) indicate residues that are highly conserved. When compared to their orthologs from other organisms, for instance, SPT5-2 is to 22.9%, 34.4% and 54.0% identical to its yeast, human and rice relatives, respectively.

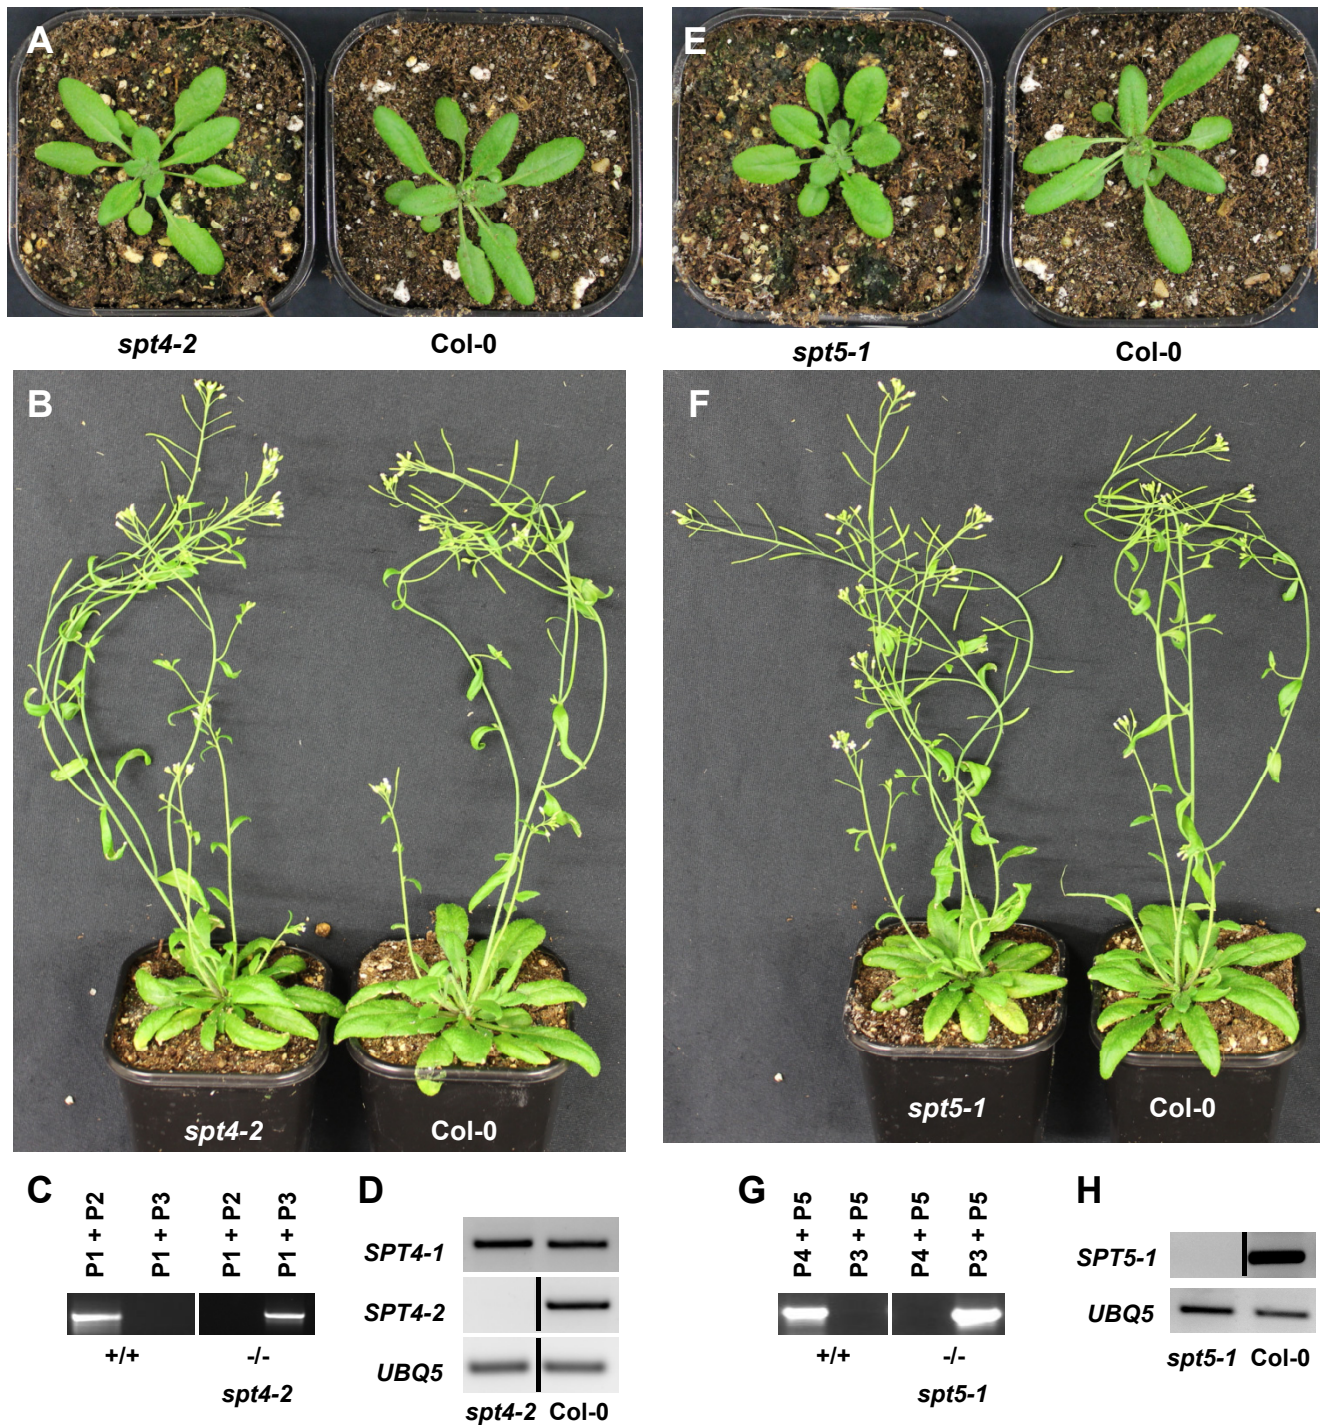

**Figure S4.** Plants that do not express *SPT4-2* or *SPT5-1* are viable. *spt4-2* plants (SAIL\_262\_E06) at 21 DAS (A) and 35 DAS (B) develop similar to *Col-0* control plants. (C) Genotyping of segregating plants by PCR with the indicated primers (cf. Fig. S1). Shown are results for a wild type plant (left) and a plant homozygous for the T-DNA insertion (*spt4-2*, right). In *spt4-2* plants no transcript of the *SPT4-2* gene is detectable by rtPCR in RNA isolated from seedlings, while the transcripts of the *SPT4-1* gene and of the reference gene *UBQ5* are present approximately at wild type levels (D). *spt5-1* plants (SAIL\_1297\_A11) at 21 DAS (E) and 35 DAS (F) develop similar to *Col-0* control plants. We noticed that the leaves of *spt5-1* plants display a somewhat more round shape than *Col-0* leaves, but whether this observation is caused by the lack of *SPT5-1* expression requires further experimentation. (G) Genotyping of segregating plants by PCR with the indicated primers (cf. Fig. S1). Shown are results for a wild type plant (left) and a plant homozygous for the T-DNA insertion (*spt5-1*, right). In *spt5-1* plants no transcript of the *SPT5-1* gene is detectable by rtPCR in RNA isolated from stamen, while the transcript of the reference gene *UBQ5* is readily detectable (H).

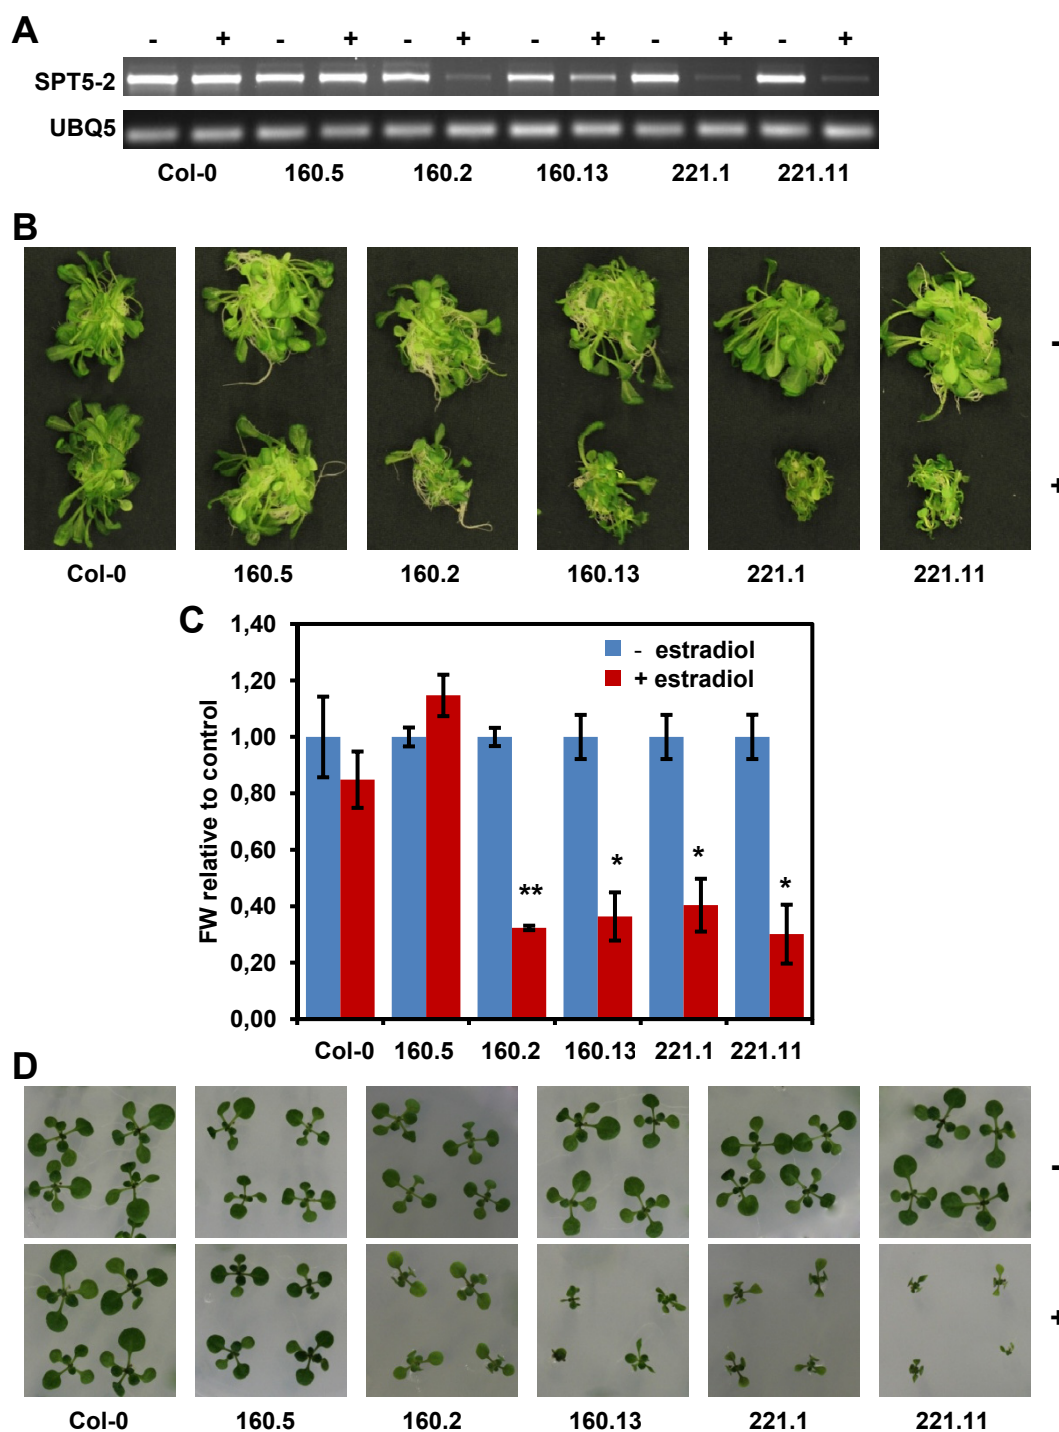

**Figure S5.** Induced expression of a *SPT5-2* RNAi construct affects plant growth. (A) Transcript level of *SPT5-2* and *UBQ5* as determined by rt-PCR in untransformed Col-0 and various independent transformed lines expressing the *SPT5-2* RNAi construct under control of an estradiol-inducible system. The application of estradiol is indicated by (+), while the untreated controls are indicated by (-). (B) The images depict each 10 seedlings that are grown in liquid MS medium in the absence of estradiol, or that were treated with estradiol. (D) Fresh-weight (FW) of seedlings grown in liquid MS medium with or without estradiol. FW of each line was normalised to the mock treatment. Relative FW was analysed using a one-way ANOVA and error bars indicate SD of two replicates. Data sets marked with asterisks are significantly different from Col-0 as assessed by Dunnett's multiple comparison test: \*  $P < 0.05$ , \*\*  $P < 0.01$ . The experiment was performed twice with similar results. (D) Seedlings grown on solid MS medium in the absence (-) or presence (+) of estradiol.



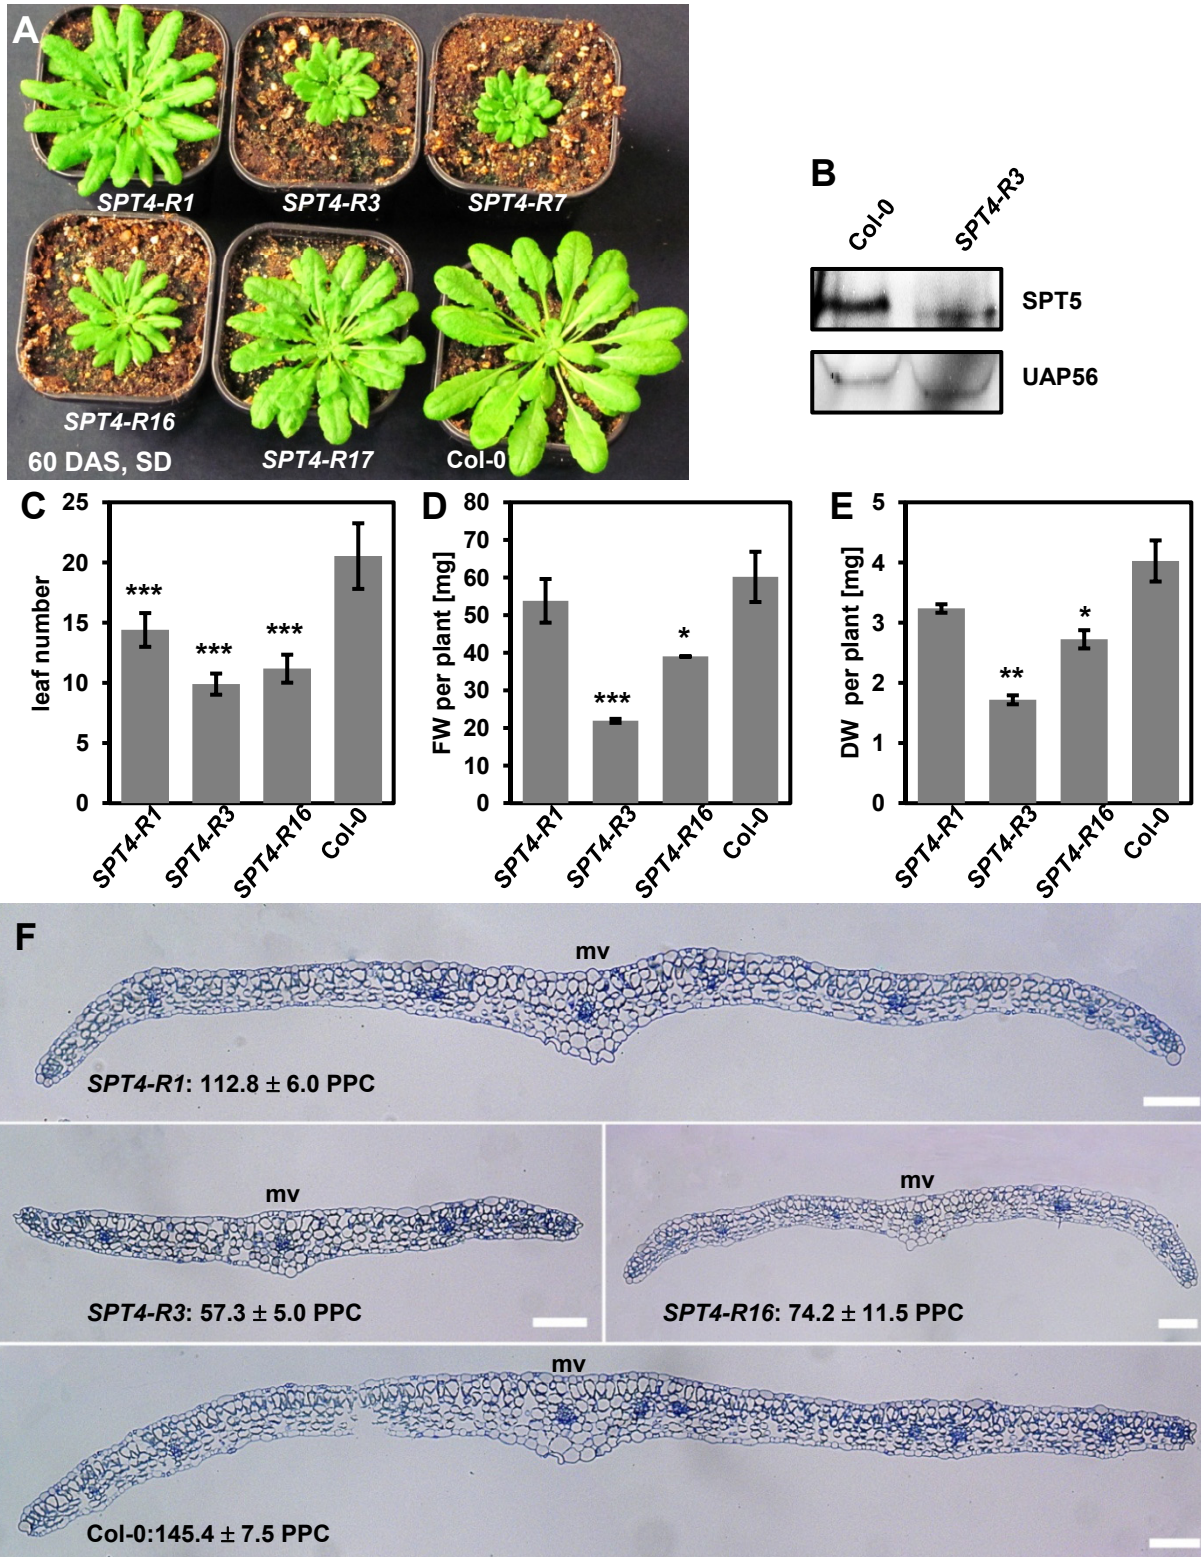

**Figure S6.** SPT4-RNAi lines exhibit reduced growth. (A) Col-0 and different RNAi lines 60 DAS, short day, soil grown. (B) Immunoblot analysis of nuclear extracts of SPT4-R3 and Col-0 plants probed with anti-SPT5 and as a reference with an antibody against RNA helicase UAP56 (28). (C-E) Quantification of total leaf number (35 DAS, long day, soil grown), fresh weight and dry weight (21 DAS, long day, grown on solid MS) of Col-0 and different RNAi plants. Leaf number, fresh/dry weight were analysed using a one-way ANOVA. Error bars indicate SD of at least 10 plants (C) and of two independent experiments with at least 35 plants per experiments (D,E). Data sets marked with asterisks are significantly different from Col-0 as assessed by Dunnett's multiple comparison test: \*  $P < 0.05$ , \*\*  $P < 0.01$  or \*\*\*  $P < 0.001$ . The experiment in (C) was performed at least three times with similar results. (F) Microscopic images of transverse sections of 12 DAS leaves. Average palisade parenchyma cell (PPC) numbers across the leaf are indicated ( $n \geq 4$ ). Scale bars represent 100  $\mu\text{m}$ .

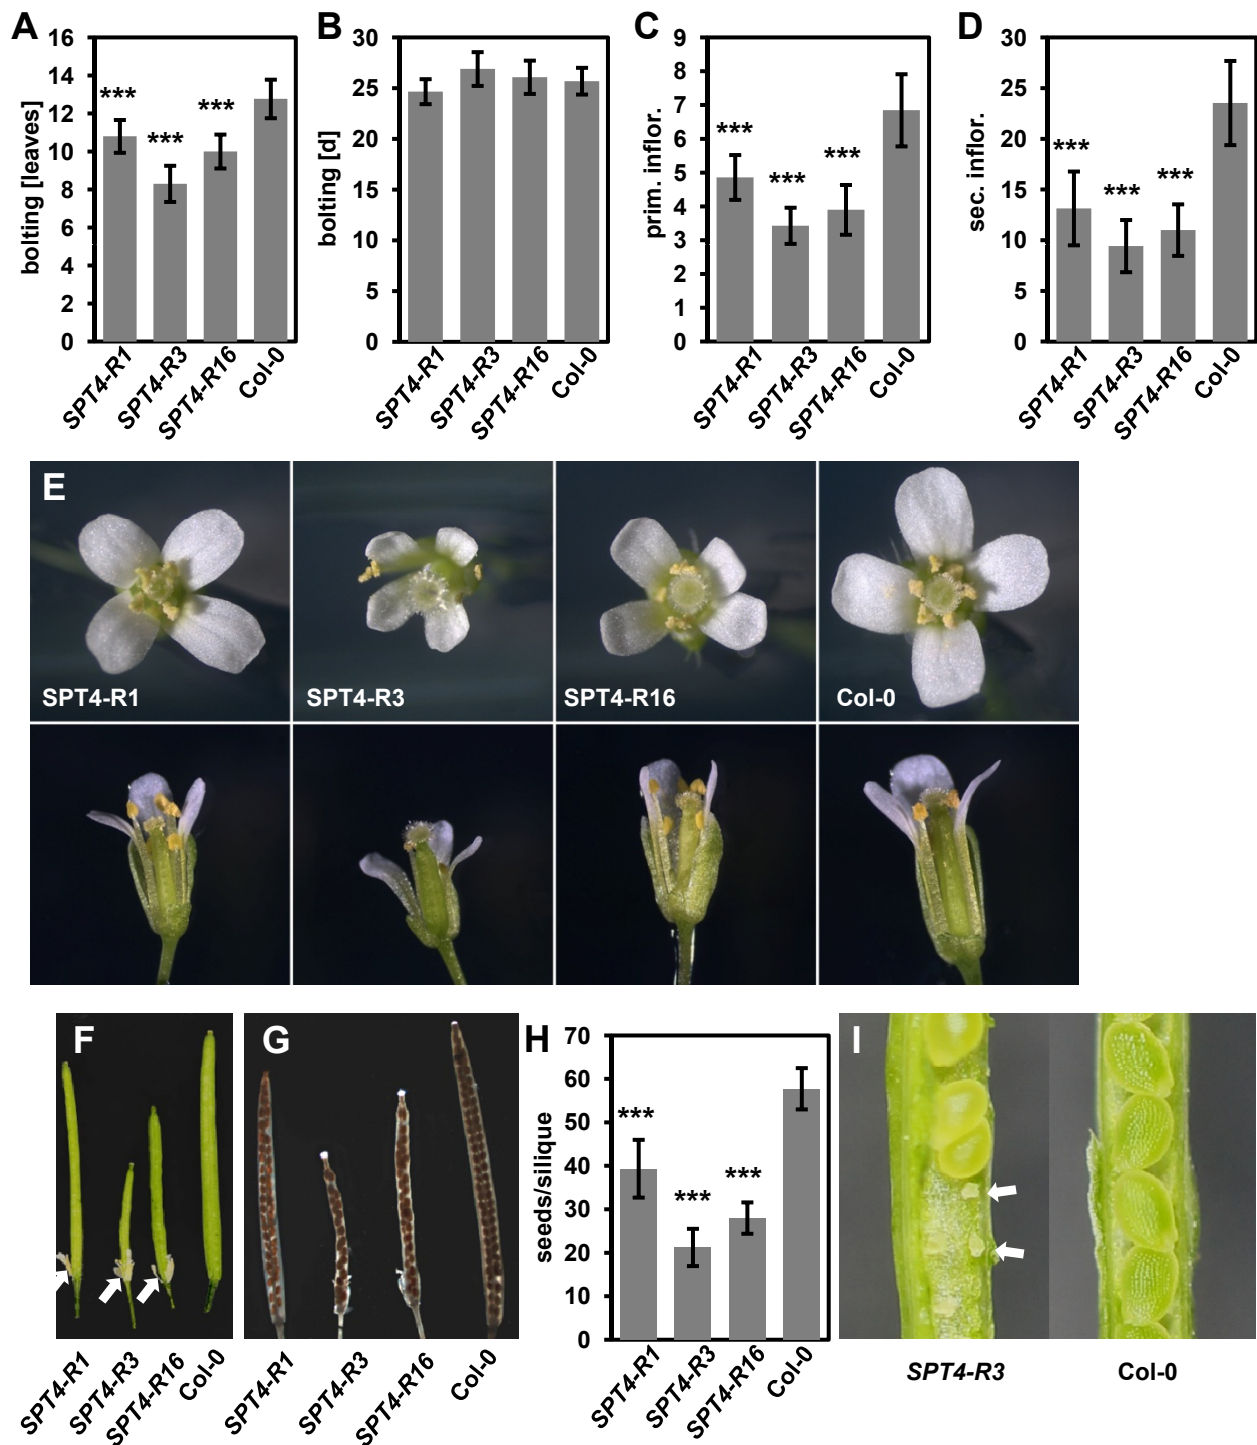

**Figure S7.** Reproductive defects of SPT4-RNAi plants relative to Col-0. Bolting of plants was scored by counting the total number of leaves (A) and by determining the time of bolting in DAS (B). The number of primary (C) and secondary (D) inflorescences was scored at 15 Days after bolting. Leaves at bolting, prim. and sec. inflorescences were analysed using a one-way ANOVA. Error bars indicate SD of at least 10 plants. Data sets marked with asterisks are significantly different from Col-0 as assessed by Dunnett's multiple comparison test: \*  $P < 0.05$ , \*\*  $P < 0.01$  or \*\*\*  $P < 0.001$ . Each experiment was performed at least three times with similar results. (E) Flowers were documented from top (top row) and from side of opened flowers (bottom row). Documentation of freshly harvested elongated siliques (F) with arrows indicated the defect in shedding floral organs, and cleared siliques illustrate the number of seeds produced (G). (H) Average number of seeds per silique. Seeds per siliques were analysed using a one-way ANOVA. Error bars indicate SD of at least 16 siliques. Data sets marked with asterisks are significantly different from Col-0 as assessed by Dunnett's multiple comparison test: \*  $P < 0.05$ , \*\*  $P < 0.01$  or \*\*\*  $P > 0.001$ . (I) Open siliques, illustrating fully developed seeds and ovules that did not develop in an SPT4-R3 silique (indicated by arrows).

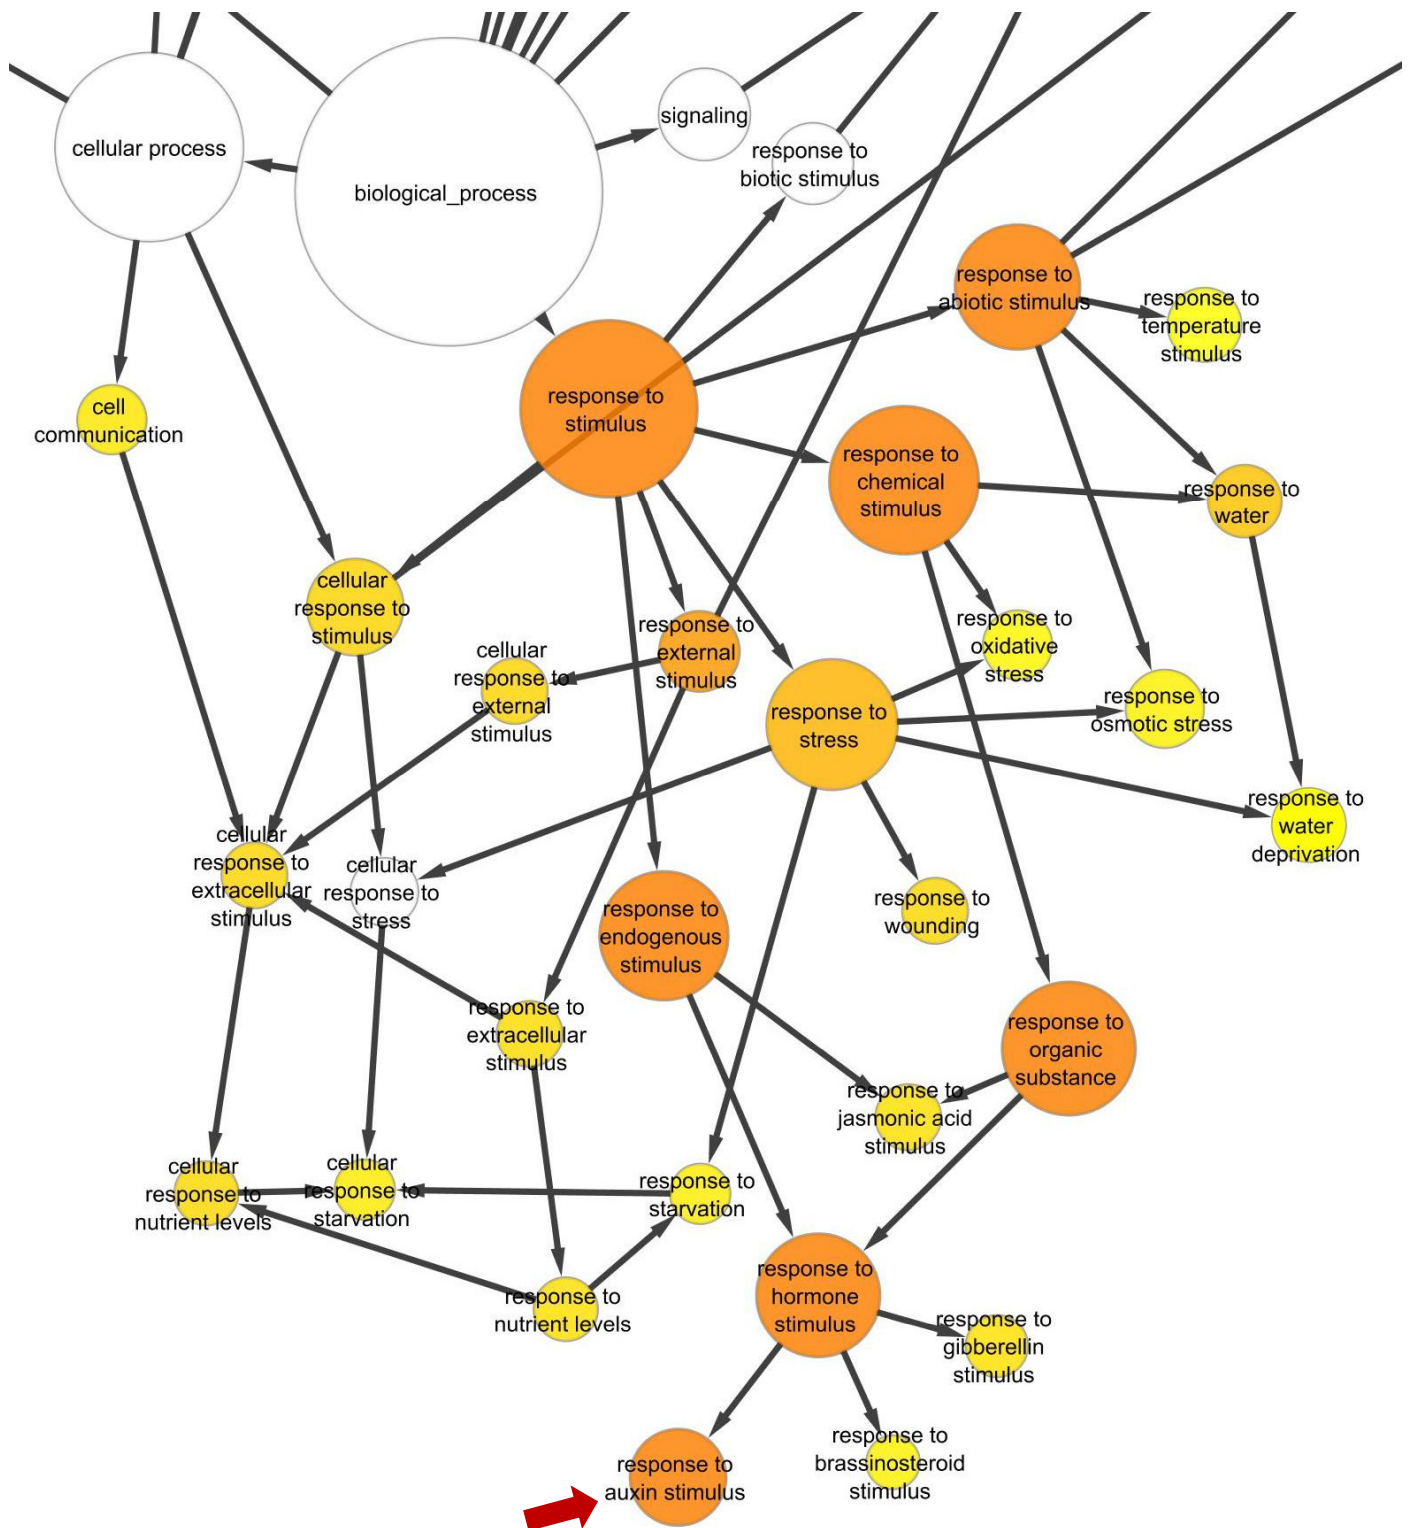

**Figure S8.** Gene ontology analysis of genes differentially expressed in SPT4-R3 relative to Col-0. The analysis was performed in Cytoscape using the BINGO plugin version (Maere et al., 2005; Shannon et al., 2003). GO categories were identified that were significantly overrepresented among the differentially expressed genes >2-fold down-regulated. The different grades of orange of the circles correspond to the level of significance of the overrepresented GO category ( $P < 0.05$ ). The size of the circles is proportional to the number of genes in each category. An arrow indicates the category of auxin-related genes that are primarily discussed here. Note that for clarity, only the part of the entire network related to the stimulus responsive categories is shown.

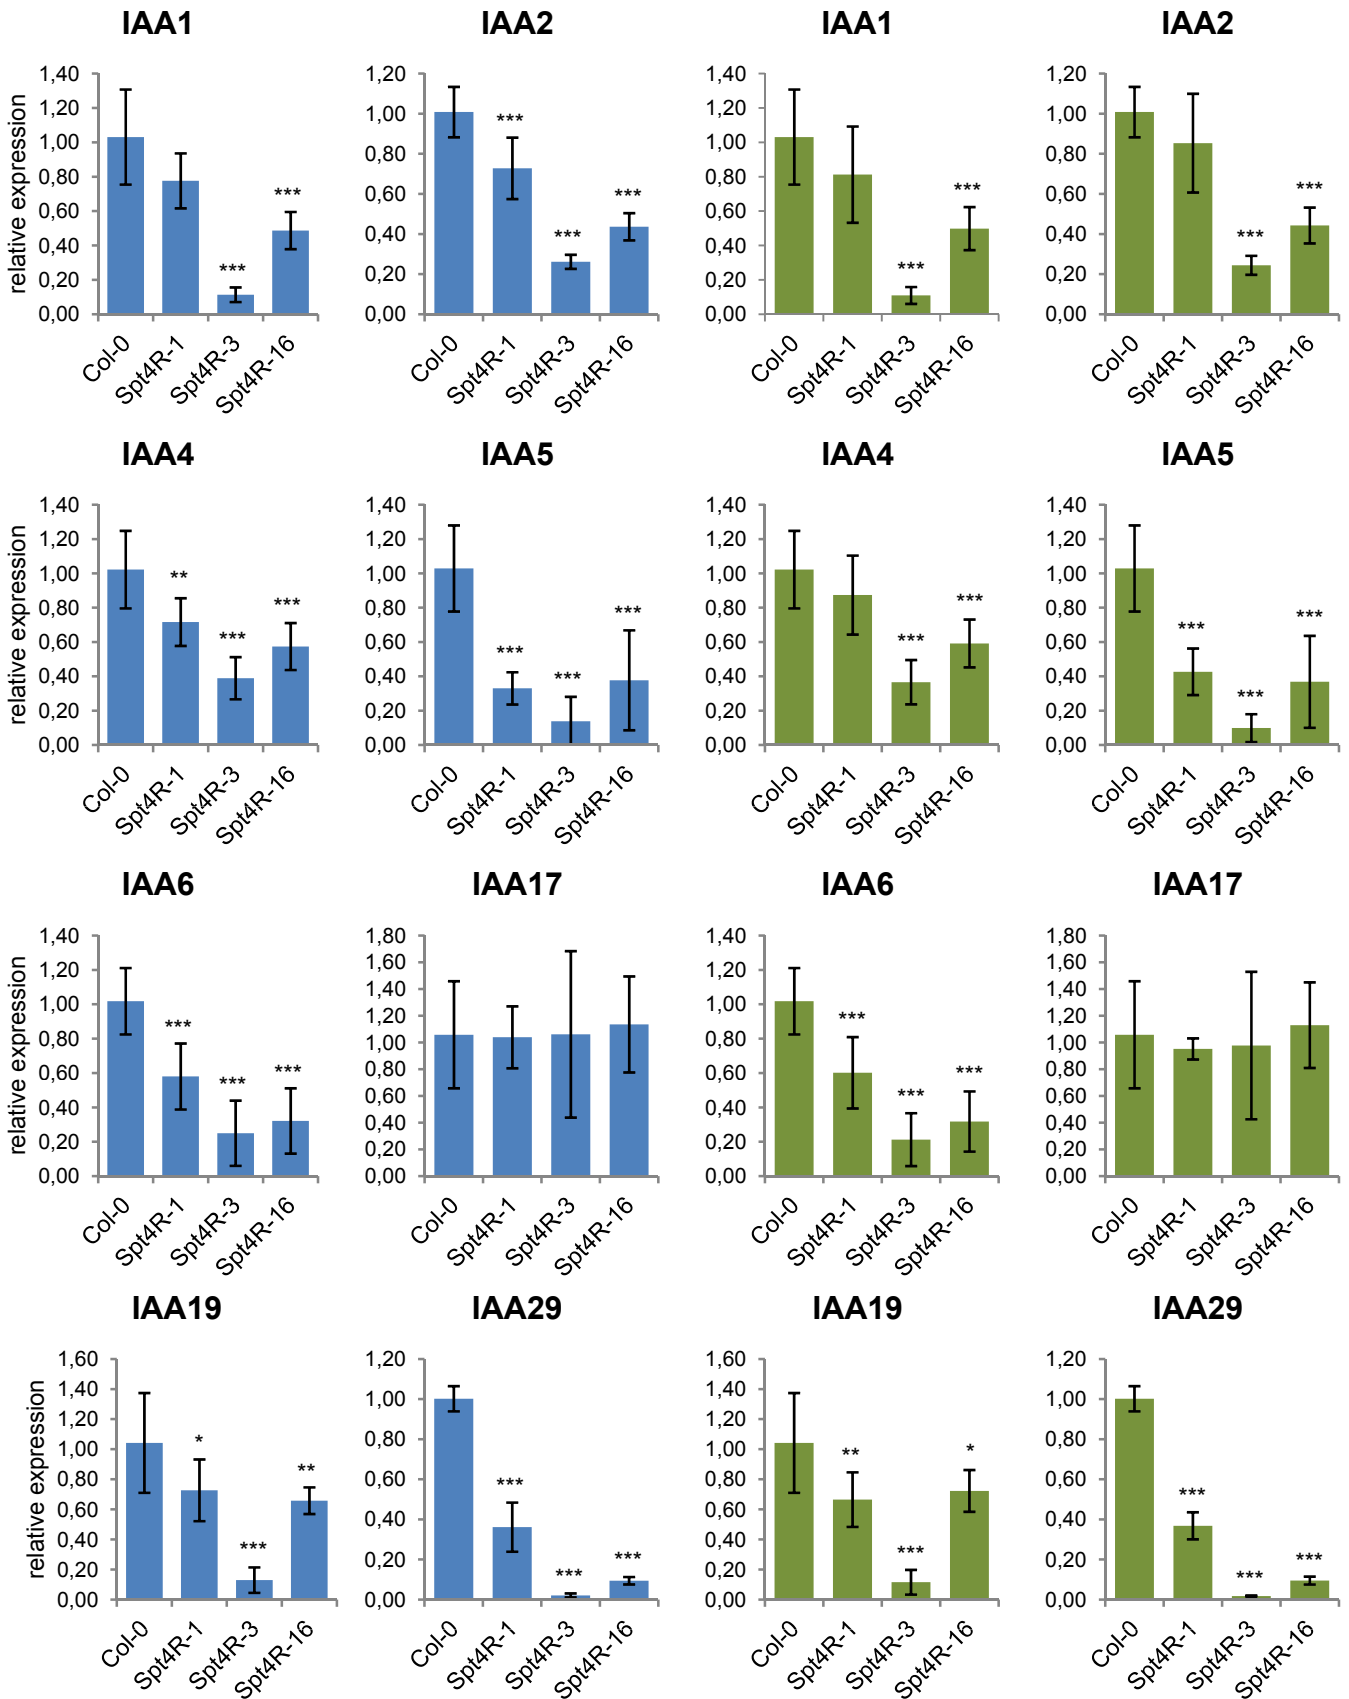

**Figure S9.** Real-time qPCR analysis of transcript levels of *AUX/IAA* genes. Quantitative rtPCR analysis of the *SPT4*-RNAi plants relative to Col-0 using as a reference *ACT8* (blue bars) or *EF1a* (green bars). Relative expression was analysed using a one-way ANOVA. Error bars indicate SD of at least three biological and three technical replicates. Data sets marked with asterisks are significantly different from wild-type as assessed by Dunnett's multiple comparison test: \*  $P < 0.05$ , \*\*  $P < 0.01$  or \*\*\*  $P < 0.001$ .

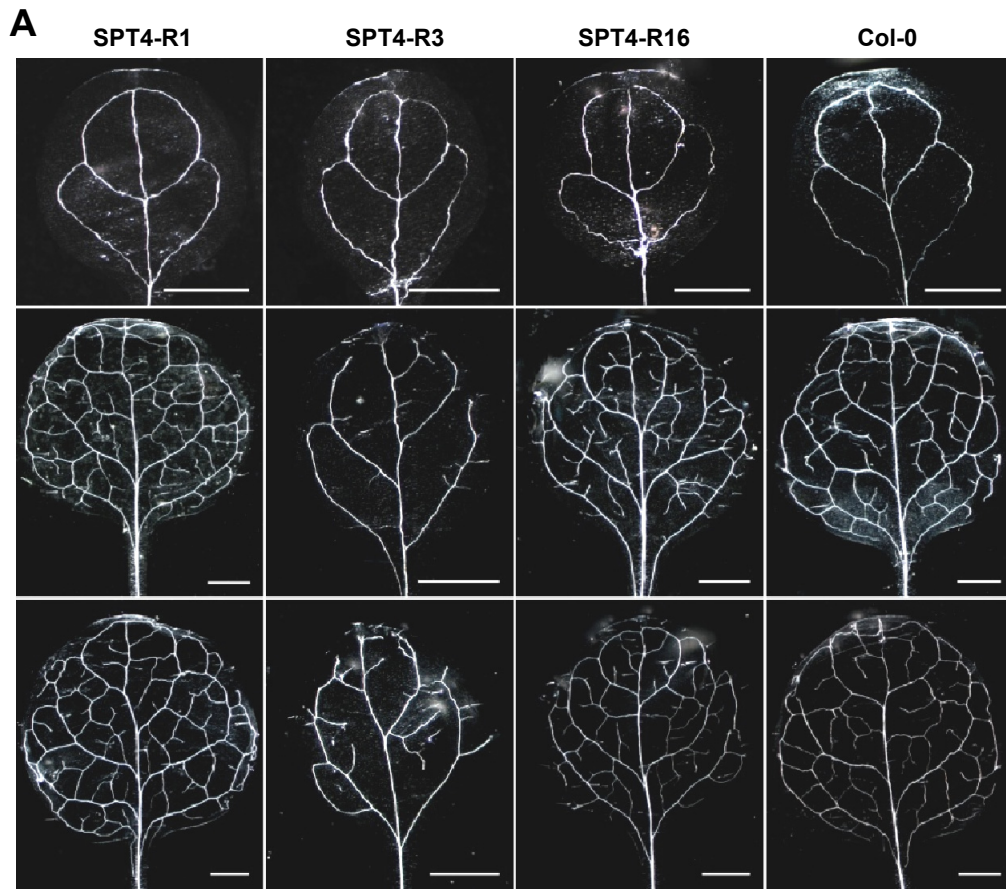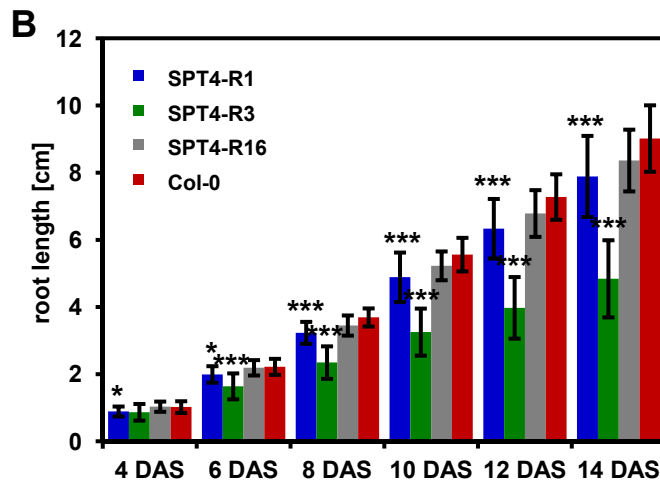

**Figure S10.** Leaf vein patterning, root growth and lateral root number of SPT4-RNAi plants relative to Col-0. (A) Vein pattern of cleared leaves of the indicated plant lines. Representative leaves of 26d old plants are shown: Cotyledon (top), first leaf (middle) and second leaf (bottom), and size bars indicate 1 mm. (B) The length of the primary root of plants grown on MS medium was measured at the indicated DAS. Root length was analysed using a one-way ANOVA. Error bars indicate SD of at least 14 plants. Data sets marked with asterisks are significantly different from Col-0 as assessed by Dunnett's multiple comparison test: \*  $P < 0.05$ , \*\*  $P < 0.01$  or \*\*\*  $P > 0.001$ . The experiment was performed three times with similar results.

Table S1. Auxin-related genes differentially expressed in SPT4-R3 relative to Col-0

| Probe set ID | Sig log ratio | Fold <sup>a</sup> change | p-value | AGI <sup>b</sup> | Gene, description <sup>2</sup>                                                                                                      |
|--------------|---------------|--------------------------|---------|------------------|-------------------------------------------------------------------------------------------------------------------------------------|
| 249719_at    | 2.48          | 5.56                     | 0.00008 | At5g35735        | auxin-responsive family protein                                                                                                     |
| 253253_at    | 1.81          | 3.50                     | 0.00002 | At4g34750        | response to auxin stimulus                                                                                                          |
| 249606_at    | 1.81          | 3.50                     | 0.00006 | At5g37260        | RVE2 (REVEILLE 2); DNA binding / transcription factor                                                                               |
| 266839_at    | 1.61          | 3.05                     | 0.00000 | At2g25930        | ELF3 (EARLY FLOWERING 3); protein C-terminus binding / transcription factor                                                         |
| 247643_at    | 1.60          | 3.03                     | 0.00003 | At5g60450        | ARF4 (AUXIN RESPONSE FACTOR 4); transcription factor                                                                                |
| 246133_at    | 1.31          | 2.47                     | 0.00008 | At5g20960        | AAO1 (ARABIDOPSIS ALDEHYDE OXIDASE 1); aldehyde oxidase/ indole-3-acetaldehyde oxidase                                              |
| 255479_at    | 1.30          | 2.46                     | 0.00000 | At4g02380        | SAG21 (SENESCENCE-ASSOCIATED GENE 21)                                                                                               |
| 256829_at    | 1.14          | 2.20                     | 0.00001 | At3g22850        | similar to auxin down-regulated protein ARG10                                                                                       |
| 247013_at    | 1.12          | 2.17                     | 0.00104 | At5g67480        | BT4 (BTB AND TAZ DOMAIN PROTEIN 4); protein binding / transcription regulator                                                       |
| 251436_at    | -1.00         | -2.01                    | 0.00009 | At3g59900        | ARGOS (AUXIN-REGULATED GENE INVOLVED IN ORGAN SIZE)                                                                                 |
| 247979_at    | -1.03         | -2.04                    | 0.00025 | At5g56750        | auxin transport                                                                                                                     |
| 250972_at    | -1.04         | -2.06                    | 0.00009 | At5g02840        | LCL1 (LHY/CCA1-like 1); DNA binding / transcription factor                                                                          |
| 254758_at    | -1.05         | -2.07                    | 0.00041 | At4g13260        | YUC2 (YUCCA2); FAD binding / NADP or NADPH binding / flavin-containing monooxygenase/ oxidoreductase                                |
| 264598_at    | -1.08         | -2.11                    | 0.00038 | At1g04610        | auxin biosynthetic process                                                                                                          |
| 247726_at    | -1.12         | -2.17                    | 0.00008 | At5g59430        | TRP1 (TELOMERIC REPEAT BINDING PROTEIN 1); DNA binding / double-stranded telomeric DNA binding                                      |
| 258402_at    | -1.13         | -2.18                    | 0.00000 | At3g15450        | similar to auxin down-regulated protein ARG10                                                                                       |
| 254926_at    | -1.13         | -2.19                    | 0.00029 | At4g11280        | ACS6 (1-AMINOCYCLOPROPANE-1-CARBOXYLIC ACID (ACC) SYNTHASE 6); 1-aminocyclopropane-1-carboxylate synthase                           |
| 267092_at    | -1.14         | -2.21                    | 0.00008 | At2g38120        | AUX1 (AUXIN RESISTANT 1); amino acid transmembrane transporter/ auxin binding / auxin influx transmembrane transporter/ transporter |
| 245244_at    | -1.15         | -2.22                    | 0.00005 | At1g44350        | ILL6; IAA-amino acid conjugate hydrolase/ metallopeptidase                                                                          |
| 264025_at    | -1.15         | -2.22                    | 0.00002 | At2g21050        | auxin mediated signaling pathway                                                                                                    |
| 258797_at    | -1.21         | -2.31                    | 0.00005 | At3g04730        | IAA16; transcription factor                                                                                                         |
| 245947_at    | -1.27         | -2.41                    | 0.00059 | At5g19530        | ACL5 (ACAULIS 5); spermine synthase/ thermospermine synthase                                                                        |
| 254746_at    | -1.27         | -2.42                    | 0.00003 | At4g12980        | auxin-responsive protein, putative                                                                                                  |

|             |       |       |         |           |                                                                                                                                               |
|-------------|-------|-------|---------|-----------|-----------------------------------------------------------------------------------------------------------------------------------------------|
| 262951_at   | -1.29 | -2.44 | 0.00026 | At1g75500 | secondary cell wall biogenesis, positive regulation of auxin metabolic process                                                                |
| 264323_at   | -1.32 | -2.50 | 0.00014 | At1g04180 | auxin biosynthetic process                                                                                                                    |
| 263890_at   | -1.35 | -2.55 | 0.00006 | At2g37030 | response to auxin stimulus                                                                                                                    |
| 263656_at   | -1.41 | -2.66 | 0.00080 | At1g04240 | SHY2 (SHORT HYPOCOTYL 2); transcription factor; IAA3                                                                                          |
| 265454_at   | -1.48 | -2.79 | 0.00002 | At2g46530 | ARF11 (AUXIN RESPONSE FACTOR 11); transcription factor                                                                                        |
| 253061_at   | -1.56 | -2.95 | 0.00001 | At4g37610 | BT5 (BTB AND TAZ DOMAIN PROTEIN 5); protein binding / transcription regulator                                                                 |
| 249109_at   | -1.62 | -3.08 | 0.00027 | At5g43700 | ATAUX2-11 (AUXIN INDUCIBLE 2-11); DNA binding / transcription factor; IAA4                                                                    |
| 265806_at   | -1.62 | -3.08 | 0.00003 | At2g18010 | response to auxin stimulus                                                                                                                    |
| 267461_at   | -1.63 | -3.09 | 0.00000 | At2g33830 | dormancy/auxin associated family protein                                                                                                      |
| 253103_at   | -1.63 | -3.10 | 0.00034 | At4g36110 | response to auxin stimulus                                                                                                                    |
| 263433_at   | -1.67 | -3.18 | 0.00001 | At2g22240 | MIPS2 (MYO-INOSITOL-1-PHOSPHATE SYNTHASE 2); binding / catalytic/ inositol-3-phosphate synthase                                               |
| 253908_at   | -1.69 | -3.23 | 0.00005 | At4g27260 | WES1; indole-3-acetic acid amido synthetase                                                                                                   |
| 261766_at   | -1.77 | -3.41 | 0.00010 | At1g15580 | IAA5 (INDOLE-3-ACETIC ACID INDUCIBLE 5); transcription factor                                                                                 |
| 248163_at   | -1.84 | -3.58 | 0.00278 | At5g54510 | DFL1 (DWARF IN LIGHT 1); indole-3-acetic acid amido synthetase                                                                                |
| 266830_at   | -1.86 | -3.64 | 0.00012 | At2g22810 | ACS4 (1-AMINOCYCLOPROPANE-1-CARBOXYLATE SYNTHASE 4); 1-aminocyclopropane-1-carboxylate synthase                                               |
| 252965_at   | -2.19 | -4.55 | 0.00000 | At4g38860 | response to auxin stimulus                                                                                                                    |
| 245593_at   | -2.23 | -4.69 | 0.00000 | At4g14550 | IAA14 (INDOLE-3-ACETIC ACID INDUCIBLE 14); protein binding / transcription factor/ transcription repressor                                    |
| 253794_at   | -2.31 | -4.95 | 0.00001 | At4g28720 | auxin biosynthetic process                                                                                                                    |
| 257766_at   | -2.36 | -5.14 | 0.00001 | At3g23030 | IAA2 (INDOLE-3-ACETIC ACID INDUCIBLE 2); transcription factor                                                                                 |
| 247925_at   | -2.50 | -5.65 | 0.00000 | At5g57560 | TCH4 (Touch 4); hydrolase, acting on glycosyl bonds / xyloglucan:xyloglucosyl transferase                                                     |
| 259790_s_at | -2.50 | -5.68 | 0.00001 | At1g29430 | response to auxin stimulus                                                                                                                    |
| 259332_at   | -2.63 | -6.20 | 0.00009 | At3g03830 | response to auxin stimulus                                                                                                                    |
| 259783_at   | -2.66 | -6.33 | 0.00001 | At1g29510 | SAUR68 (SMALL AUXIN UPREGULATED 68)                                                                                                           |
| 260152_at   | -2.73 | -6.63 | 0.00000 | At1g52830 | IAA6 (INDOLE-3-ACETIC ACID 6); transcription factor                                                                                           |
| 245276_at   | -2.77 | -6.81 | 0.00001 | At4g16780 | ATHB-2 (ARABIDOPSIS THALIANA HOMEBOX PROTEIN 2); DNA binding / protein homodimerization/ sequence-specific DNA binding / transcription factor |
| 258399_at   | -2.80 | -6.97 | 0.00000 | At3g15540 | IAA19 (INDOLE-3-ACETIC ACID INDUCIBLE 19); transcription factor                                                                               |
| 257506_at   | -2.81 | -7.03 | 0.00000 | At1g29440 | response to auxin stimulus                                                                                                                    |
| 245397_at   | -3.07 | -8.42 | 0.00001 | At4g14560 | IAA1 (INDOLE-3-ACETIC ACID INDUCIBLE); protein binding / transcription factor                                                                 |

|             |       |               |                |                  |                                                                        |
|-------------|-------|---------------|----------------|------------------|------------------------------------------------------------------------|
| 259784_at   | -3.17 | <b>-9.01</b>  | <b>0.00000</b> | At1g29450        | response to auxin stimulus                                             |
| 259787_at   | -3.21 | <b>-9.28</b>  | <b>0.00001</b> | At1g29460        | response to auxin stimulus                                             |
| 248801_at   | -3.41 | <b>-10.61</b> | <b>0.00000</b> | At5g47370        | HAT2; DNA binding / transcription factor/ transcription repressor      |
| 259331_at   | -3.45 | <b>-10.89</b> | <b>0.00001</b> | At3g03840        | response to auxin stimulus                                             |
| 259773_at   | -3.46 | <b>-11.02</b> | <b>0.00000</b> | At1g29500        | response to auxin stimulus                                             |
| 250012_x_at | -4.48 | <b>-22.35</b> | <b>0.00000</b> | At5g18060        | response to auxin stimulus                                             |
| 253423_at   | -4.62 | <b>-24.61</b> | <b>0.00000</b> | <b>At4g32280</b> | <b>IAA29 (INDOLE-3-ACETIC ACID INDUCIBLE 29); transcription factor</b> |

<sup>a</sup>only genes are shown, whose transcript levels were  $\geq 2$ -fold up- or down-regulated (highlighted in pink and blue, respectively) in SPT4-R3 relative to Col-0.

<sup>b</sup>AUX/IAA genes are highlighted in green.



Table S2. Mass spectrometry results of the SPT4-GS affinity purification

| AGI       | #IPs <sup>a</sup> | mass [kDa] | Mascot mean score | description <sup>b</sup>                              |
|-----------|-------------------|------------|-------------------|-------------------------------------------------------|
| At4g08350 | 5                 | 115.3      | 2115.30           | SPT5-2                                                |
| At5g04290 | 5                 | 157.9      | 1103.76           | SPT5L                                                 |
| At5g63670 | 5                 | 13.4       | 330.78            | SPT4-2                                                |
| At5g08565 | 5                 | 13.4       | 223.97            | SPT4-1                                                |
| At5g13680 | 5                 | 146.5      | 176.90            | ELO2                                                  |
| At1g02080 | 4                 | 269.7      | 712.05            | CCR4-NOT subunit 1                                    |
| At4g19210 | 3                 | 68.3       | 319.52            | ABC transporter E family member 2                     |
| At2g42520 | 3                 | 67.6       | 297.93            | DEAD-box ATP-dependent RNA helicase 37                |
| At5g50320 | 3                 | 63.1       | 222.10            | ELO3                                                  |
| At3g62530 | 3                 | 38.1       | 127.45            | armadillo/beta-catenin-like repeat-containing protein |
| At1g53165 | 2                 | 76.5       | 461.20            | map 4 kinase alpha1                                   |
| At4g35800 | 2                 | 204.9      | 393.60            | NRPB1                                                 |
| At1g32380 | 2                 | 43.3       | 318.15            | ribose-phosphate pyrophosphokinase 2                  |
| At5g27970 | 2                 | 180.4      | 259.06            | armadillo/beta-catenin-like repeat-containing protein |
| At5g43780 | 2                 | 52.1       | 251.81            | sulfate adenylyltransferase                           |
| At2g02740 | 2                 | 29.7       | 140.00            | ssDNA-binding transcriptional regulator               |
| At1g79530 | 2                 | 44.8       | 122.45            | glyceraldehyde 3-phosphate dehydrogenase              |
| At5g53460 | 1                 | 242.7      | 2953.00           | NADH-dependent glutamate synthase                     |
| At3g46740 | 1                 | 89.1       | 760.84            | protein TOC75-3                                       |
| At4g21710 | 1                 | 134.9      | 667.08            | NRPB2                                                 |
| At4g11820 | 1                 | 51.1       | 604.11            | hydroxymethylglutaryl-CoA synthase                    |
| At3g21140 | 1                 | 42.8       | 528.56            | Pyridoxamine 5'-phosphate oxidase family protein      |
| At1g80070 | 1                 | 275.3      | 501.99            | Pre-mRNA-processing-splicing factor                   |
| At5g60790 | 1                 | 66.8       | 428.71            | ABC transporter F family member 1                     |
| At1g36160 | 1                 | 251.6      | 412.81            | acetyl-CoA carboxylase 1                              |
| At3g15220 | 1                 | 76.3       | 389.84            | putative protein kinase                               |
| At4g31490 | 1                 | 106        | 350.33            | coatomer subunit beta-2                               |
| At2g27040 | 1                 | 102.8      | 329.86            | argonaute 4                                           |
| At1g33410 | 1                 | 169.3      | 245.44            | suppressor of auxin resistance1 protein (SAR1)        |
| At3g09840 | 1                 | 89.3       | 237.59            | cell division control protein 48-A                    |
| At3g05680 | 1                 | 226.8      | 220.79            | embryo defective 2016                                 |
| At1g72560 | 1                 | 111.4      | 202.00            | protein PAUSED (mediates nuclear export of tRNAs)     |
| At2g41040 | 1                 | 28.9       | 197.31            | S-adenosyl-L-methionine-dependent methyltransferases  |
| At3g48860 | 1                 | 54.1       | 188.57            | uncharacterized protein                               |
| At1g05460 | 1                 | 113.3      | 188.41            | RNA helicase SDE3                                     |
| At5g03540 | 1                 | 72.3       | 188.07            | exocyst subunit exo70 family protein A1               |
| At1g14850 | 1                 | 159.9      | 178.50            | nucleoporin 155                                       |
| At3g05040 | 1                 | 133.1      | 175.07            | HASTY                                                 |
| At1g69220 | 1                 | 124.5      | 169.50            | putative serine/threonine kinase                      |
| At1g27595 | 1                 | 104.9      | 165.16            | symplekin                                             |
| At5g36230 | 1                 | 49.3       | 158.10            | armadillo/beta-catenin-like repeat-containing protein |
| At4g38600 | 1                 | 82.6       | 157.17            | E3 ubiquitin-protein ligase UPL3                      |

|           |   |       |        |                                                                  |
|-----------|---|-------|--------|------------------------------------------------------------------|
| At2g41220 | 1 | 177.6 | 144.76 | ferredoxin-dependent glutamate synthase precursor                |
| At2g18960 | 1 | 104.2 | 141.64 | H(+)-ATPase 1                                                    |
| At1g78900 | 1 | 68.8  | 138.58 | V-type proton ATPase catalytic subunit A                         |
| At2g46280 | 1 | 36.3  | 133.01 | eukaryotic translation initiation factor 3 delta subunit         |
| At2g07698 | 1 | 85.9  | 130.15 | F-type H <sup>+</sup> -transporting ATPase subunit alpha         |
| At5g64270 | 1 | 141.4 | 127.50 | putative splicing factor                                         |
| At1g50360 | 1 | 129.9 | 127.36 | P-loop containing nucleoside triphosphate hydrolase-like protein |
| At1g53500 | 1 | 75.2  | 119.68 | UDP-glucose 4,6-dehydratase                                      |
| At1g45000 | 1 | 44.7  | 117.48 | AAA-type ATPase family protein                                   |
| At1g21170 | 1 | 122.6 | 115.96 | Exocyst complex component SEC5                                   |
| At2g02560 | 1 | 134.8 | 108.73 | cullin-associated NEDD8-dissociated protein 1                    |
| At5g26830 | 1 | 80.9  | 107.43 | threonyl-tRNA synthetase                                         |
| At4g00800 | 1 | 211.9 | 103.21 | transducin family protein / WD-40 repeat family protein          |

<sup>a</sup>numbers indicate in how many out of a total of 5 experiments the respective protein was identified.

<sup>b</sup>proteins discussed in this report are highlighted in yellow.

Table S3. Oligonucleotide primers used in this study and construction of plasmids

| #  | primer                                    | use                                                                                       | plasmid               | restr. site      |
|----|-------------------------------------------|-------------------------------------------------------------------------------------------|-----------------------|------------------|
| P1 | ATGGGAAGCGCACCAGCT                        | Genotyping, T-DNA insertion <i>spt4-2</i> (At5Gg63670)                                    |                       |                  |
| P2 | CATCGACCATTCCACAAGATT                     | Genotyping, T-DNA insertion <i>spt4-2</i> (At5g63670)                                     |                       |                  |
| P3 | GCCTTTTCAGAAATGGATAAATAGCCTTGCTTCC        | Genotyping, T-DNA insertion SAIL LB ( <i>spt4-2</i> , <i>spt5-1</i> and <i>spt5-2-4</i> ) |                       |                  |
| P4 | GGGAACCCGGGATCATGGGGA                     | Genotyping, T-DNA insertion <i>spt5-1</i> (At2g34210)                                     |                       |                  |
| P5 | TGGGGTCACTCATGAACTAATTGGC                 | Genotyping, T-DNA insertion <i>spt5-1</i> (At2g34210)                                     |                       |                  |
|    | GTTCATAGGCGAAGCATCATGA                    | Genotyping, T-DNA insertion <i>spt5-2-1</i> (At4g08350)                                   |                       |                  |
|    | GGTGACTTCTGAGAACCAATCT                    | Genotyping, T-DNA insertion <i>spt5-2-1</i> (At4g08350)                                   |                       |                  |
|    | TGCATTCTTCACTGGTCTGCTGCAC                 | Genotyping, T-DNA insertion <i>spt5-2-2</i> (At4g08350)                                   |                       |                  |
|    | ACCTCCAGAGTCCCGCATTGGA                    | Genotyping, T-DNA insertion <i>spt5-2-2</i> (At4g08350)                                   |                       |                  |
|    | CTTGGCTAAGGCCAGGTC                        | Genotyping, T-DNA insertion <i>spt5-2-3</i> (At4g08350)                                   |                       |                  |
|    | TTGTGTTGCACTTGTTCCCAG                     | Genotyping, T-DNA insertion <i>spt5-2-3</i> (At4g08350)                                   |                       |                  |
|    | AGGAAATCAAGCCAAACCATG                     | Genotyping, T-DNA insertion <i>spt5-2-4</i> (At4g08350)                                   |                       |                  |
|    | TGGTGGTAGTTACTCGGATGC                     | Genotyping, T-DNA insertion <i>spt5-2-4</i> (At4g08350)                                   |                       |                  |
|    | ATTTTGCCGATTTCCGGAAC                      | Genotyping, T-DNA insertion SALK Lb1.3 ( <i>spt5-2-1</i> , 2, 3)                          |                       |                  |
|    | TCACATGCGTTTCGGCAGAA                      | Genotyping, T-DNA insertion SPT4RNAi                                                      |                       |                  |
|    | GAAGAGCCAATTAAGATAAAACGTTGAATGTA          | Genotyping, T-DNA insertion SPT4RNAi                                                      |                       |                  |
|    | TGGGCTGCAGGTCGAGGCTA                      | Genotyping, T-DNA insertion SPT5RNAi activator unit                                       |                       |                  |
|    | CGCAAGACCCTTCCTCTATA                      | Genotyping, T-DNA insertion SPT5RNAi activator unit                                       |                       |                  |
|    | TGGGCTGCAGGTCGAGGCTA                      | Genotyping, T-DNA insertion SPT5RNAi responder unit                                       |                       |                  |
|    | TCCTCATGCCCTTGATTGCCTCTT                  | Genotyping, T-DNA insertion SPT5RNAi responder unit                                       |                       |                  |
|    | AACCCGGGTCACATGCGTTTCGGCAGAA              | Insertion of <i>SPT4-2</i> (At5g63670) CDS in pFGC5941                                    | pFGC5941-SPT4-2       | XbaI, Swal       |
|    | AATCTAGAATGGGAAGCGCACCAGCT                | Insertion of <i>SPT4-2</i> (At5g63670) CDS in pFGC5941                                    | pFGC5941-SPT4-2       | XmaI, Swal       |
|    | AATTTCTAGAGGCGCGCCTATATGTTGAAGCAGACAAGG   | Insertion of <i>SPT5-2</i> (At4g08350) CDS in pFGC5941                                    | pFGC5941-SPT5-2       | XbaI, AscI       |
|    | AATTGGATCCATTTAAATGTTGGTGTAAACATTCTGAACAG | Insertion of <i>SPT5-2</i> (At4g08350) CDS in pFGC5941                                    | pFGC5941-SPT5-2       | BamHI, Swal      |
|    | CACCGGCGCGCCGAGCTCGGTACCCGACGAG           | Insertion of UBQ10-Promotor (At4g05320) in pMDC150                                        | pMDC150-UBQP          | Gateway® cloning |
|    | GGCGCGCCCTGTTAATCAGAAAACTCAG              | Insertion of UBQ10-Promotor (At4g05320) in pMDC150                                        | pMDC150-UBQP          | Gateway® cloning |
|    | CACCTACATTTACAATTACCATGG                  | Insertion of SPT5-RNAi in pMDC160 or pMDC221                                              | pMDC160/221-SPT5RNAi  | Gateway® cloning |
|    | GTCTTAATTAACCTCTCTAGA                     | Insertion of SPT5-RNAi in pMDC160 or pMDC221                                              | pMDC160/221-SPT5RNAi  | Gateway® cloning |
|    | TTGGGCCCAACAATGGGAAGCGCACCAGCTCAGATTC     | Insertion of <i>SPT4-2</i> (At5g63670) CDS in pCambia2300-GS                              | pCambia2300-SPT4-2-GS | SmaI             |

|                                        |                                                                 |                       |       |
|----------------------------------------|-----------------------------------------------------------------|-----------------------|-------|
| TTGAGCTCTCACATGCGTTTCGGCAGAACAT        | Insertion of <i>SPT4-2</i> (At5g63670) CDS in pCambia2300-GS    | pCambia2300-SPT4-2-GS | SacI  |
| AATTGGATCCACTCCAATGCGGGACTCTGGAGC      | Insertion of <i>SPT5-2</i> (At4g08350) C-terminal CDS in pQE9   | pQE-SPT5-2C           | BamHI |
| AATTCTGCAGTCACGGTTGCACAACTTGGCTAATAAGG | Insertion of <i>SPT5-2</i> (At4g08350) C-terminal CDS in pQE9   | pQE-SPT5-2C           | XhoI  |
| AATTGGTACCATGCCGCGAAGCAGAGACGAAG       | Insertion of <i>SPT5-2</i> (At4g08350) N-terminal CDS in pBC-SK | pBC-SK-SPT5-2N        | KpnI  |
| AATGAGCTCCCAGCTTACTGGCTAGTGCC          | Insertion of <i>SPT5-2</i> (At4g08350) N-terminal CDS in pBC-SK | pBC-SK-SPT5-2N        | SacI  |
| AATTGGTACCATGGATCGCAAGGGAAAGGG         | Insertion of <i>SPT5-L</i> (At5g04290) N-terminal CDS in pBC-SK | pBC-SK-SPT5-LN        | KpnI  |
| AATTGAGCTCGGACAGTAACTCCCCACCAT         | Insertion of <i>SPT5-L</i> (At5g04290) N-terminal CDS in pBC-SK | pBC-SK-SPT5-LN        | SacI  |
| ATGGGAGAAGCGCCTGCC                     | Expression of <i>SPT4-1</i> (At5g08565)                         |                       |       |
| ACTTCCATTATAACCTCCATC                  | Expression of <i>SPT4-1</i> (At5g08565)                         |                       |       |
| ATGGGAAGCGCACCAGCT                     | Expression of <i>SPT4-2</i> (At5g63670)                         |                       |       |
| CATCGACCATTCCACAAGATT                  | Expression of <i>SPT4-2</i> (At5g63670)                         |                       |       |
| AACTTCCTACTTACCTACCACACCCG             | Expression of <i>SPT5-1</i> (At2g34210)                         |                       |       |
| GGCTCACTTTGTTCTGTGTCGCTC               | Expression of <i>SPT5-1</i> (At2g34210)                         |                       |       |
| CAGATAATGTTGCGACAACACCGTTTAG           | Expression of <i>SPT5-2</i> (At4g08350)                         |                       |       |
| CTGATATTGAGGACTCGTTCCCC                | Expression of <i>SPT5-2</i> (At4g08350)                         |                       |       |
| GAAGGCGAAGATCCAAGACAAGGAA              | Expression of <i>UBQ5</i> (At3g62250)                           |                       |       |
| GGAGGACGAGATGAAGCGTCGA                 | Expression of <i>UBQ5</i> (At3g62250)                           |                       |       |
| TCGTTTGGGATTACCCGGAGCA                 | qRT-PCR, <i>IAA1</i> (At4g14560)                                |                       |       |
| TTGTGTTTTTGCAGGAGGAGGA                 | qRT-PCR, <i>IAA1</i> (At4g14560)                                |                       |       |
| CCTCCTACCAAACTCAAATCGTTGG              | qRT-PCR, <i>IAA2</i> (At3g23030)                                |                       |       |
| GAGATCGATCTTGCGAAGGTAAGGA              | qRT-PCR, <i>IAA2</i> (At3g23030)                                |                       |       |
| TCTCTGTGGGAGAGTACTTTGAGAGA             | qRT-PCR, <i>SHY2/IAA3</i> (At1g04240)                           |                       |       |
| GCACGTACATATGAACATCTCCCATG             | qRT-PCR, <i>SHY2/IAA3</i> (At1g04240)                           |                       |       |
| CCAGGGACAGAAGAACTGTTTCTTG              | qRT-PCR, <i>IAA4</i> (At5g43700)                                |                       |       |
| CCAACAATCTGAGCCTTTGGAGGA               | qRT-PCR, <i>IAA4</i> (At5g43700)                                |                       |       |
| GGATGCTTGCTGGAGATGTTCCCTT              | qRT-PCR, <i>IAA5</i> (At1g15580)                                |                       |       |
| CTGTAAGGCTCACTCACATTCACATG             | qRT-PCR, <i>IAA5</i> (At1g15580)                                |                       |       |
| AGTCACGGTTCTTGAGAATCTCTTCG             | qRT-PCR, <i>IAA6</i> (At1g52830)                                |                       |       |
| AGGTACATCTCCGACGAGCATCC                | qRT-PCR, <i>IAA6</i> (At1g52830)                                |                       |       |
| ATCTACGACTCATGACGTCGTGACT              | qRT-PCR, <i>IAA17</i> (At1g04250)                               |                       |       |
| ATCACGTTCTCCGGTATGATCTCAC              | qRT-PCR, <i>IAA17</i> (At1g04250)                               |                       |       |
| CCTCCTACCAAACTCAAATCGTTGG              | qRT-PCR, <i>IAA19</i> (At3g15540)                               |                       |       |
| GAGATCGATCTTGCGAAGGTAAGGA              | qRT-PCR, <i>IAA19</i> (At3g15540)                               |                       |       |
| GGGGATGTTACATGGAAGATCTTTGC             | qRT-PCR, <i>IAA29</i> (At4g32280)                               |                       |       |
| GGTCCGATTTGAACGCCTATCCTT               | qRT-PCR, <i>IAA29</i> (At4g32280)                               |                       |       |
| TGCTGGTCGTGACCTTACTGATTACC             | qRT-PCR, <i>Actin8</i> (At1g49240)                              |                       |       |

|                                |                                        |  |  |
|--------------------------------|----------------------------------------|--|--|
| TCTCCATCTCTTGCTCGTAGTCGACA     | qRT-PCR, <i>Actin8</i> (At1g49240)     |  |  |
| CTCACATTTTCGTAGCCGCAAGAC       | qRT-PCR, <i>EF1α</i> (At5g60390)       |  |  |
| GATCAAGTGACCAGTTGTGGTCCGAT     | qRT-PCR, <i>EF1α</i> (At5g60390)       |  |  |
| TTGGGAAATACTGTAATAAGCTTCCT     | ChIP qPCR, At3g02260-1                 |  |  |
| TCCATGTGTTATTCTAATGATGTGCT     | ChIP qPCR, At3g02260-1                 |  |  |
| ACCGCCTTTCCCTCTTTGTCGT         | ChIP qPCR, At3g02260-2                 |  |  |
| GTCTCAAAGCGTAGCTTGCCAGA        | ChIP qPCR, At3g02260-2                 |  |  |
| AGATGGTTTTCGGGGAGGAAAATCAC     | ChIP qPCR, At3g02260-3                 |  |  |
| GCTTCTCTTTGACAGGCCAGAG         | ChIP qPCR, At3g02260-3                 |  |  |
| CAGGCGTTATCTCTTGAACCATTGC      | ChIP qPCR, At3g02260-4                 |  |  |
| TACTTGCTGTAGCCACACTCGTTG       | ChIP qPCR, At3g02260-4                 |  |  |
| CAAACCCAAGAAACCGGTCCACA        | ChIP qPCR, At3g02260-5                 |  |  |
| GAGTTGATTTGTCGAGCCACGA         | ChIP qPCR, At3g02260-5                 |  |  |
| CCAACACATTTACGTTACACAAAACC     | ChIP qPCR, At3g02260-6                 |  |  |
| TTAATTCAAACGCGACGAGTTAACCAT    | ChIP qPCR, At3g02260-6                 |  |  |
| ATGGGCTTAACCTTAAGGACACAGAG     | ChIP qPCR, <i>IAA1-5'</i> (At4g14560)  |  |  |
| GAGCAGATTCTTCTGTTGAGTCGTTG     | ChIP qPCR, <i>IAA1-5'</i> (At4g14560)  |  |  |
| GGATGTTGGTCGGTGATGTTCCA        | ChIP qPCR, <i>IAA1-3'</i> (At4g14560)  |  |  |
| GTTTTGCCTCGACCAAAAAGGTGT       | ChIP qPCR, <i>IAA1-3'</i> (At4g14560)  |  |  |
| GGGAGAGATGTGGCAGAGAAGATG       | ChIP qPCR, <i>IAA19-5'</i> (At3g15540) |  |  |
| CCTTCTCAGCGTCACCACCAGA         | ChIP qPCR, <i>IAA19-5'</i> (At3g15540) |  |  |
| CATATTTGTGCAGGTGTGGCCTTG       | ChIP qPCR, <i>IAA19-3'</i> (At3g15540) |  |  |
| TAGAACATACCCCAAGGTACATCAC      | ChIP qPCR, <i>IAA19-3'</i> (At3g15540) |  |  |
| GACGAAGCTGCCTTAGAAATGGAGT      | ChIP qPCR, <i>IAA29-5'</i> (At4g32280) |  |  |
| GGTACCCAAACAAGACGCAGCA         | ChIP qPCR, <i>IAA29-5'</i> (At4g32280) |  |  |
| TAGAGATCGACCGTGTGCATATAACAAG   | ChIP qPCR, <i>IAA29-3'</i> (At4g32280) |  |  |
| TAGAAGAATAGAGGAAAAAGATCGAGTGGA | ChIP qPCR, <i>IAA29-3'</i> (At4g32280) |  |  |
